# Supplementary material for: PERK Inhibition Mitigates Restenosis and Thrombosis: A Potential Low-Thrombogenic Antirestenotic Paradigm
Source: PubMed Central journal article supplement — JACC Basic Transl Sci. 2020 Feb 19;5(3):245–63. doi: 10.1016/j.jacbts.2019.12.005 (PMC7091514; doi:10.1016/j.jacbts.2019.12.005), 2020-02-19

## Supplementary Figure Legends

### ***Fig.S1. Immunofluorescent co-stainings and quantitation of P-PERK and SMC marker $\alpha$ -SMA following targeted delivery of PERK inhibitor GSK2606414 in vivo.***

Angioplastied rats were subject to targeted delivery of PERK inhibitor GSK2606414 using 2 distinct platforms as illustrated in Fig.1 and Fig.2. Carotid artery sections were then subject to immunofluorescent co-stainings of P-PERK and  $\alpha$ -SMA in control versus targetedly treated groups.

A, D. Representative images of P-PERK and  $\alpha$ -SMA co-stainings from animals treated with biomimetic nanocluster (A) and peri-carotid hydrogel (D) for targeted delivery of PERK inhibitor.

B, E. Quantitation of  $\alpha$ -SMA fluorescent intensity per cell to demonstrate the efficacy of targetedly delivered PERK inhibitor in restoring  $\alpha$ -SMA expression levels in vivo.

C, F. Quantitation of P-PERK fluorescent intensity per cell to validate the efficacy of the targetedly delivered PERK inhibitor. Mean  $\pm$  SEM, n=4 rats; \*p<0.05, \*\*p<0.01, \*\*\*p<0.001. Unpaired Student's t-test (E, F) and One-way ANOVA with Bonferroni post hoc test (B, C).

### ***Fig.S2. Quantitation of PERK pathway activation in balloon-injured rat carotid arteries***

Quantitation of PERK pathway proteins in injured arteries following angioplasty as described in Fig.3. Rat common carotid arteries were harvested at days 3, 7, and 14 (3d-14d) for tissue homogenate immunoblotting analysis and immunofluorescent co-stainings of P-PERK and  $\alpha$ -SMA.

A-C. Quantitation of protein level changes for PERK pathway proteins P-eIF2 $\alpha$ , ATF4, and CHOP. Mean  $\pm$  SEM, n=3 rats; \*p<0.05, \*\*p<0.01, \*\*\*p<0.001. One-way ANOVA with Bonferroni post hoc test.

D-F. Quantitation of P-PERK fluorescent intensity per cell and P-PERK positive cell percentage in intima and media layers. Mean  $\pm$  SEM, n=4 rats; \*p<0.05, \*\*p<0.01, \*\*\*p<0.001. One-way ANOVA with Bonferroni post hoc test.

### ***Fig.S3. In vivo adenovirus-mediated PERK gain-of-function in balloon-injured rat carotid arteries***

Rat carotid arteries were injured with balloon angioplasty, and subsequently locally infused with adenoviruses overexpressing GFP (Ad-GFP) or PERK (Ad-PERK) as described in [method](#) section.

A. Adenovirus-infected rat carotid arteries were harvested at day 3 post injury for protein extraction and immunoblot analysis. In vivo infection efficiency was manifested by increased level of P-PERK and P-eIF2 $\alpha$ .

B. Adenovirus-infected rat carotid arteries were harvested at day 14 post injury for RNA extraction and qPCR analysis. Mean  $\pm$  SEM, n=6 rats; \*p<0.05. Unpaired Student's t-test.

### ***Fig.S4. PERK loss- and gain-of-function respectively rescues and exacerbates the reduction of SMC contractile markers at mRNA levels***

To corroborate our findings on PERK's involvement in regulating SMC phenotypic switching, we evaluated the mRNA levels of additional SMC contractile markers including  $\alpha$ -SMA, CNN1 (calponin), and MYH11 (smooth muscle myosin heavy chain). Experiments were performed as described in Fig.4.

A-C. Pharmacological blockade of PERK kinase activity. Quantitation of mRNA level changes

revealed effective restoration of PDGF-BB-induced reduction of  $\alpha$ -SMA and CNN1 mRNA. D-G. PERK genetic silencing. Consistent with  $\alpha$ -SMA protein level change observed in Fig.4, PERK silencing with a different siRNA recapitulated the rescuing effect in multiple SMC contractile markers.

H-J. Adenovirus-mediated PERK gain-of-function. PERK overexpression reduced the mRNA levels of SMC contractile markers  $\alpha$ -SMA and CNN1 at basal level.

All data are presented as mean  $\pm$  SEM, n=6; \*p<0.05, \*\*p<0.01, \*\*\*p<0.001. One-way ANOVA with Bonferroni post hoc test.

***Fig.S5. Effect of PERK inhibition in a murine FeCl<sub>3</sub>-induced thrombosis model***

Mouse carotid arteries were locally applied with FeCl<sub>3</sub>-soaked patches to induce thrombosis formation. Mice were pre-treated with either vehicle or PERK inhibitor GSK2606414 (150 mg/kg) 4 hours prior to experiment.

A. Representative H&E staining of FeCl<sub>3</sub>-injured carotid arteries from mice treated with vehicle or GSK2606414.

B. Heart rate was monitored during the procedure. Initial and terminal heart rates are shown here. n=15-16 mice.

***Fig.S6. PERK inhibitors were identified with differential inhibition over SMC versus EC in a high-throughput phenotype screening***

Human aortic SMCs and ECs were screened for their differential phenotypes to the PKIS 2 kinase inhibitor library as previously described.

A. Scheme of the high-throughput drug screening. Cell viability was selected as the phenotype readout of the assay.

B. Overview of the drug screening result.

C. Among the identified hits with differential inhibition over SMC versus EC, we discovered 3 compounds that were previously shown with selective inhibition to PERK. These 3 compounds were derivatives of the first-in-class PERK inhibitor GSK2606414.

## Supplemental table

**Table S1. Antibodies used in Western blotting and immunofluorescent staining**

| Antigen             | Manufacturer              | Catalog Number | Dilution Ratio | Application        |
|---------------------|---------------------------|----------------|----------------|--------------------|
| P-PERK              | Abcam                     | ab192591       | 1:100          | Immunofluorescence |
| $\alpha$ -SMA       | Cell Signaling Technology | 48938s         | 1:100          | Immunofluorescence |
| P-PERK              | Santa Cruz                | sc-32577       | 1:100          | Western Blot       |
| P-EIF2 $\alpha$     | Cell Signaling Technology | 3398           | 1:1000         | Western Blot       |
| P-STAT3             | Cell Signaling Technology | 4113           | 1:1000         | Western Blot       |
| P-P65               | Cell Signaling Technology | 3033           | 1:1000         | Western Blot       |
| MRTF-A              | Cell Signaling Technology | 14760          | 1:1000         | Western Blot       |
| CD142/Tissue Factor | Thermo Fisher             | PA5-27278      | 1:500          | Western Blot       |
| CHOP                | Santa Cruz                | sc-8327        | 1:100          | Western Blot       |
| ATF4                | Abcam                     | ab184909       | 1:1000         | Western Blot       |
| Cyclin D1           | Abcam                     | ab134175       | 1:1000         | Western Blot       |
| $\alpha$ -SMA       | Sigma-Aldrich             | A2547          | 1:5000         | Western Blot       |
| $\beta$ -actin      | Sigma-Aldrich             | A5441          | 1:5000         | Western Blot       |

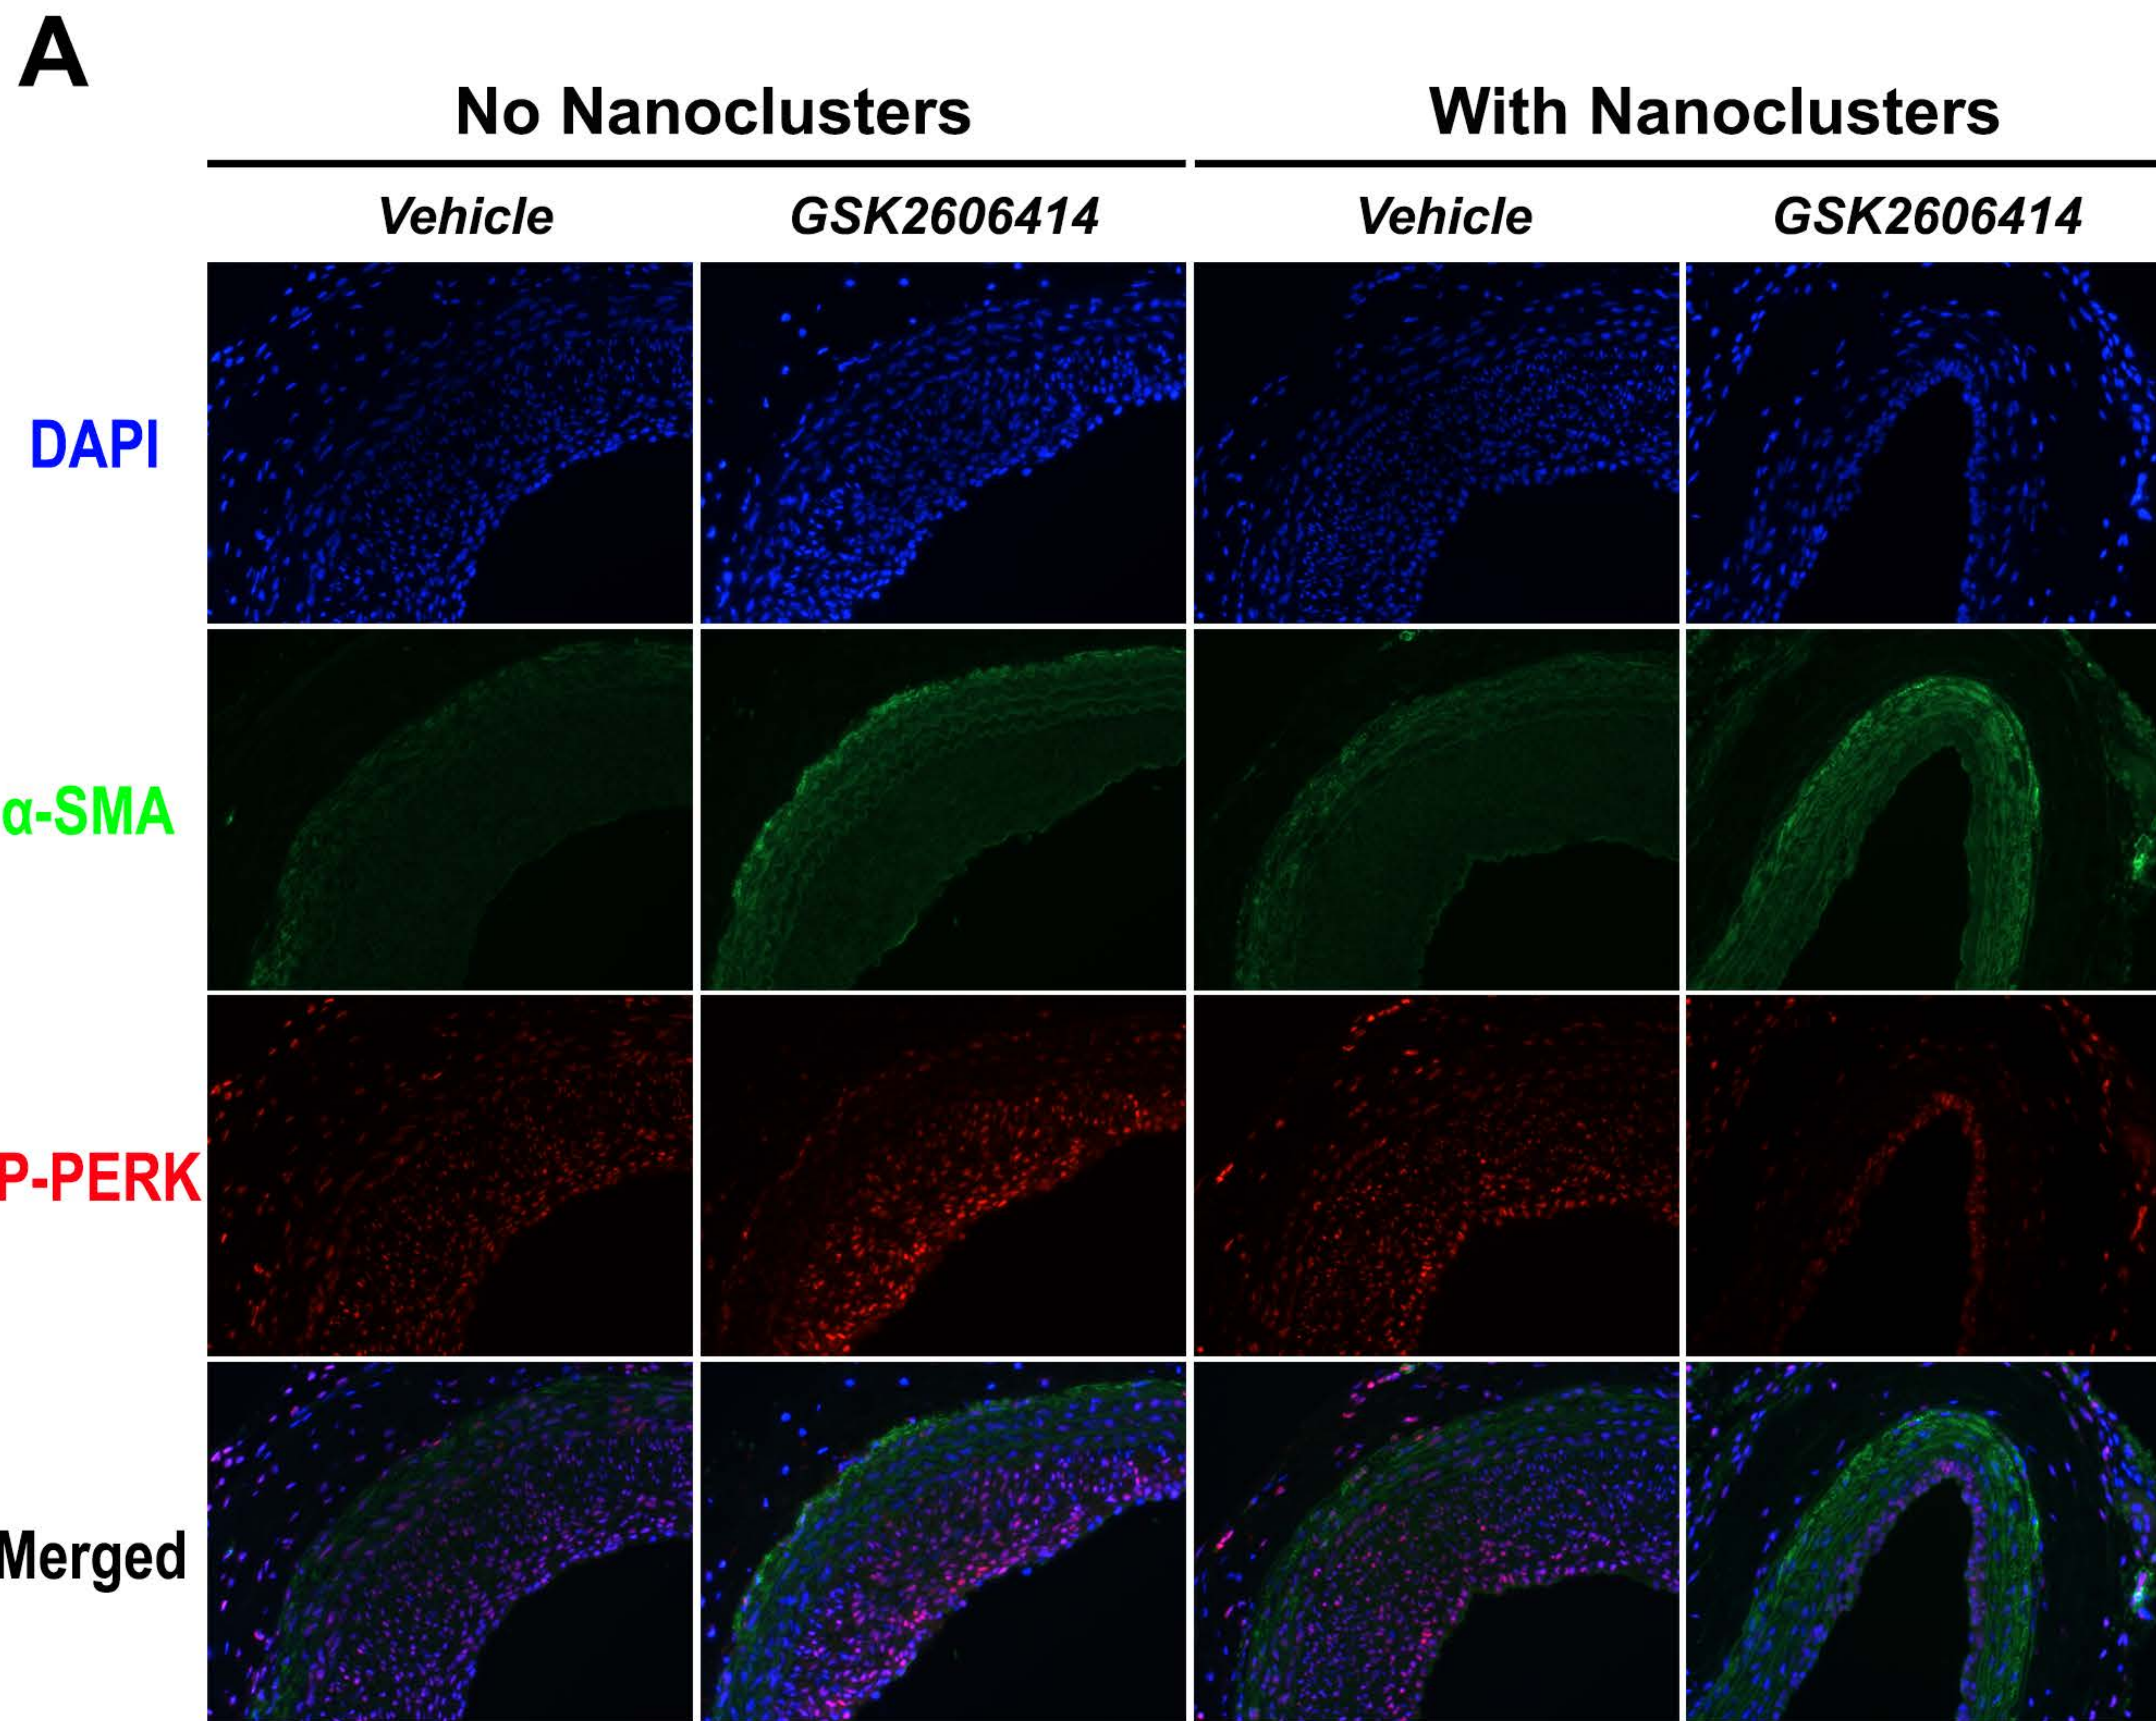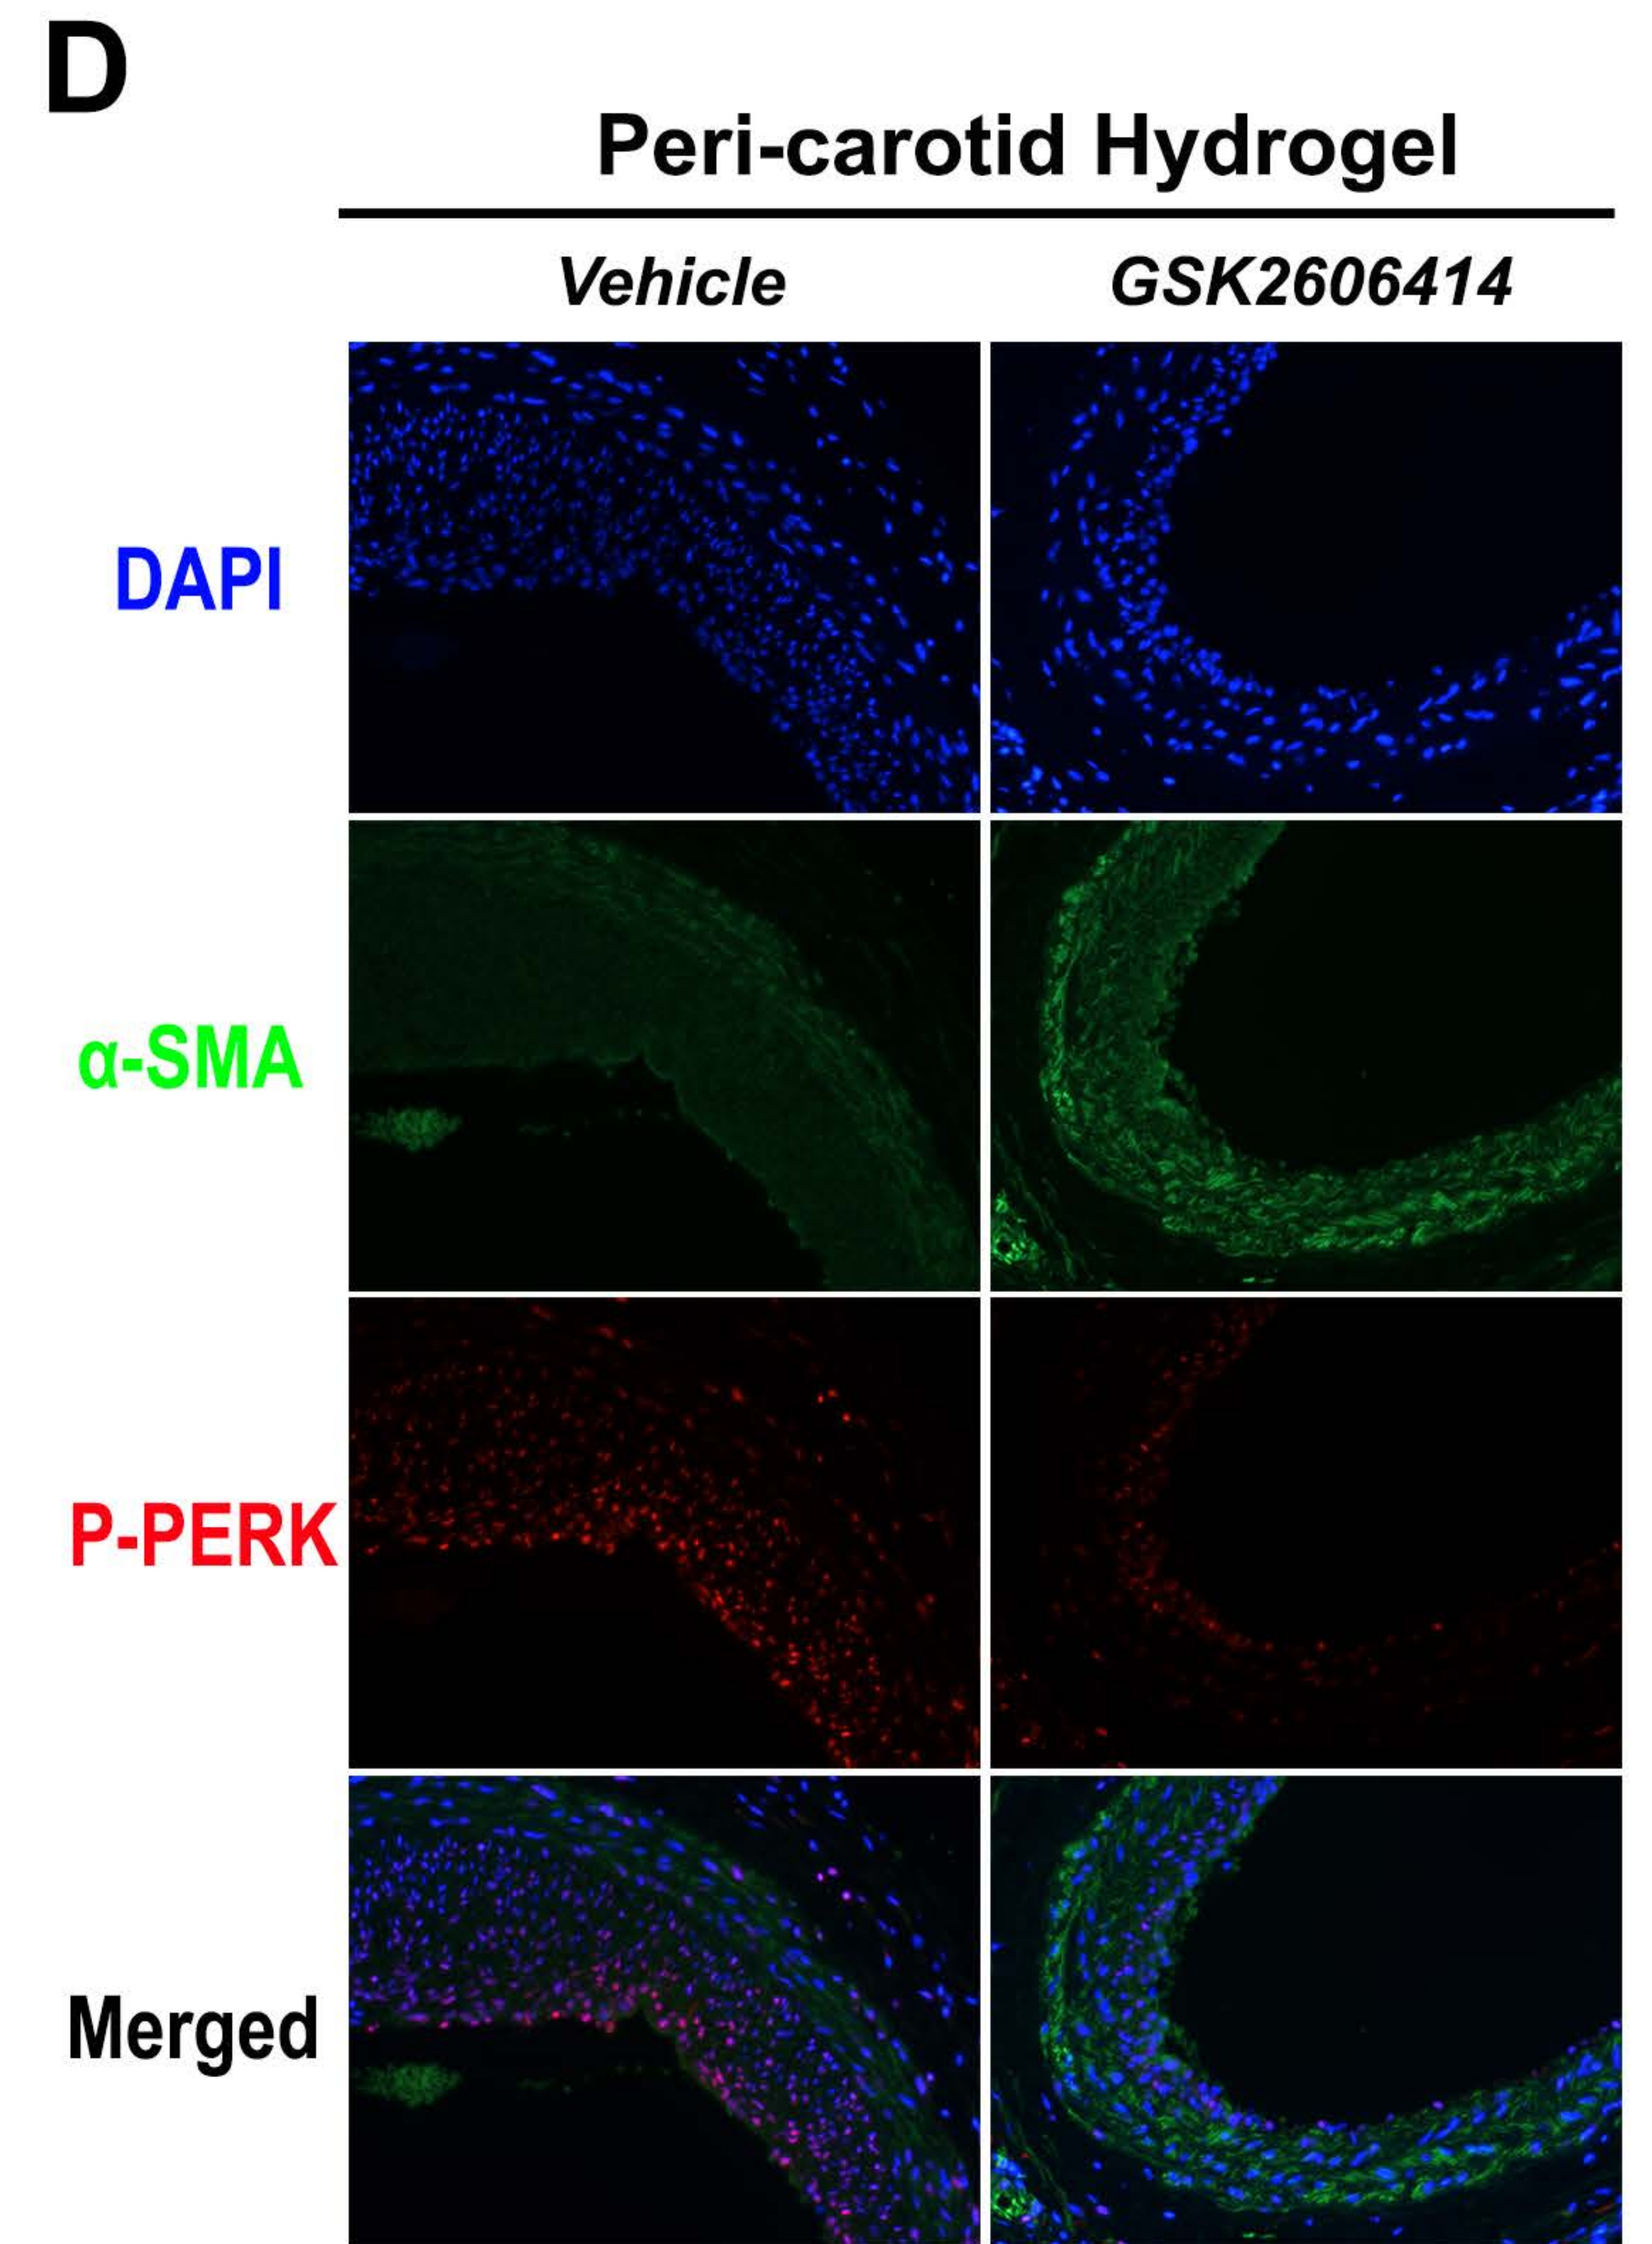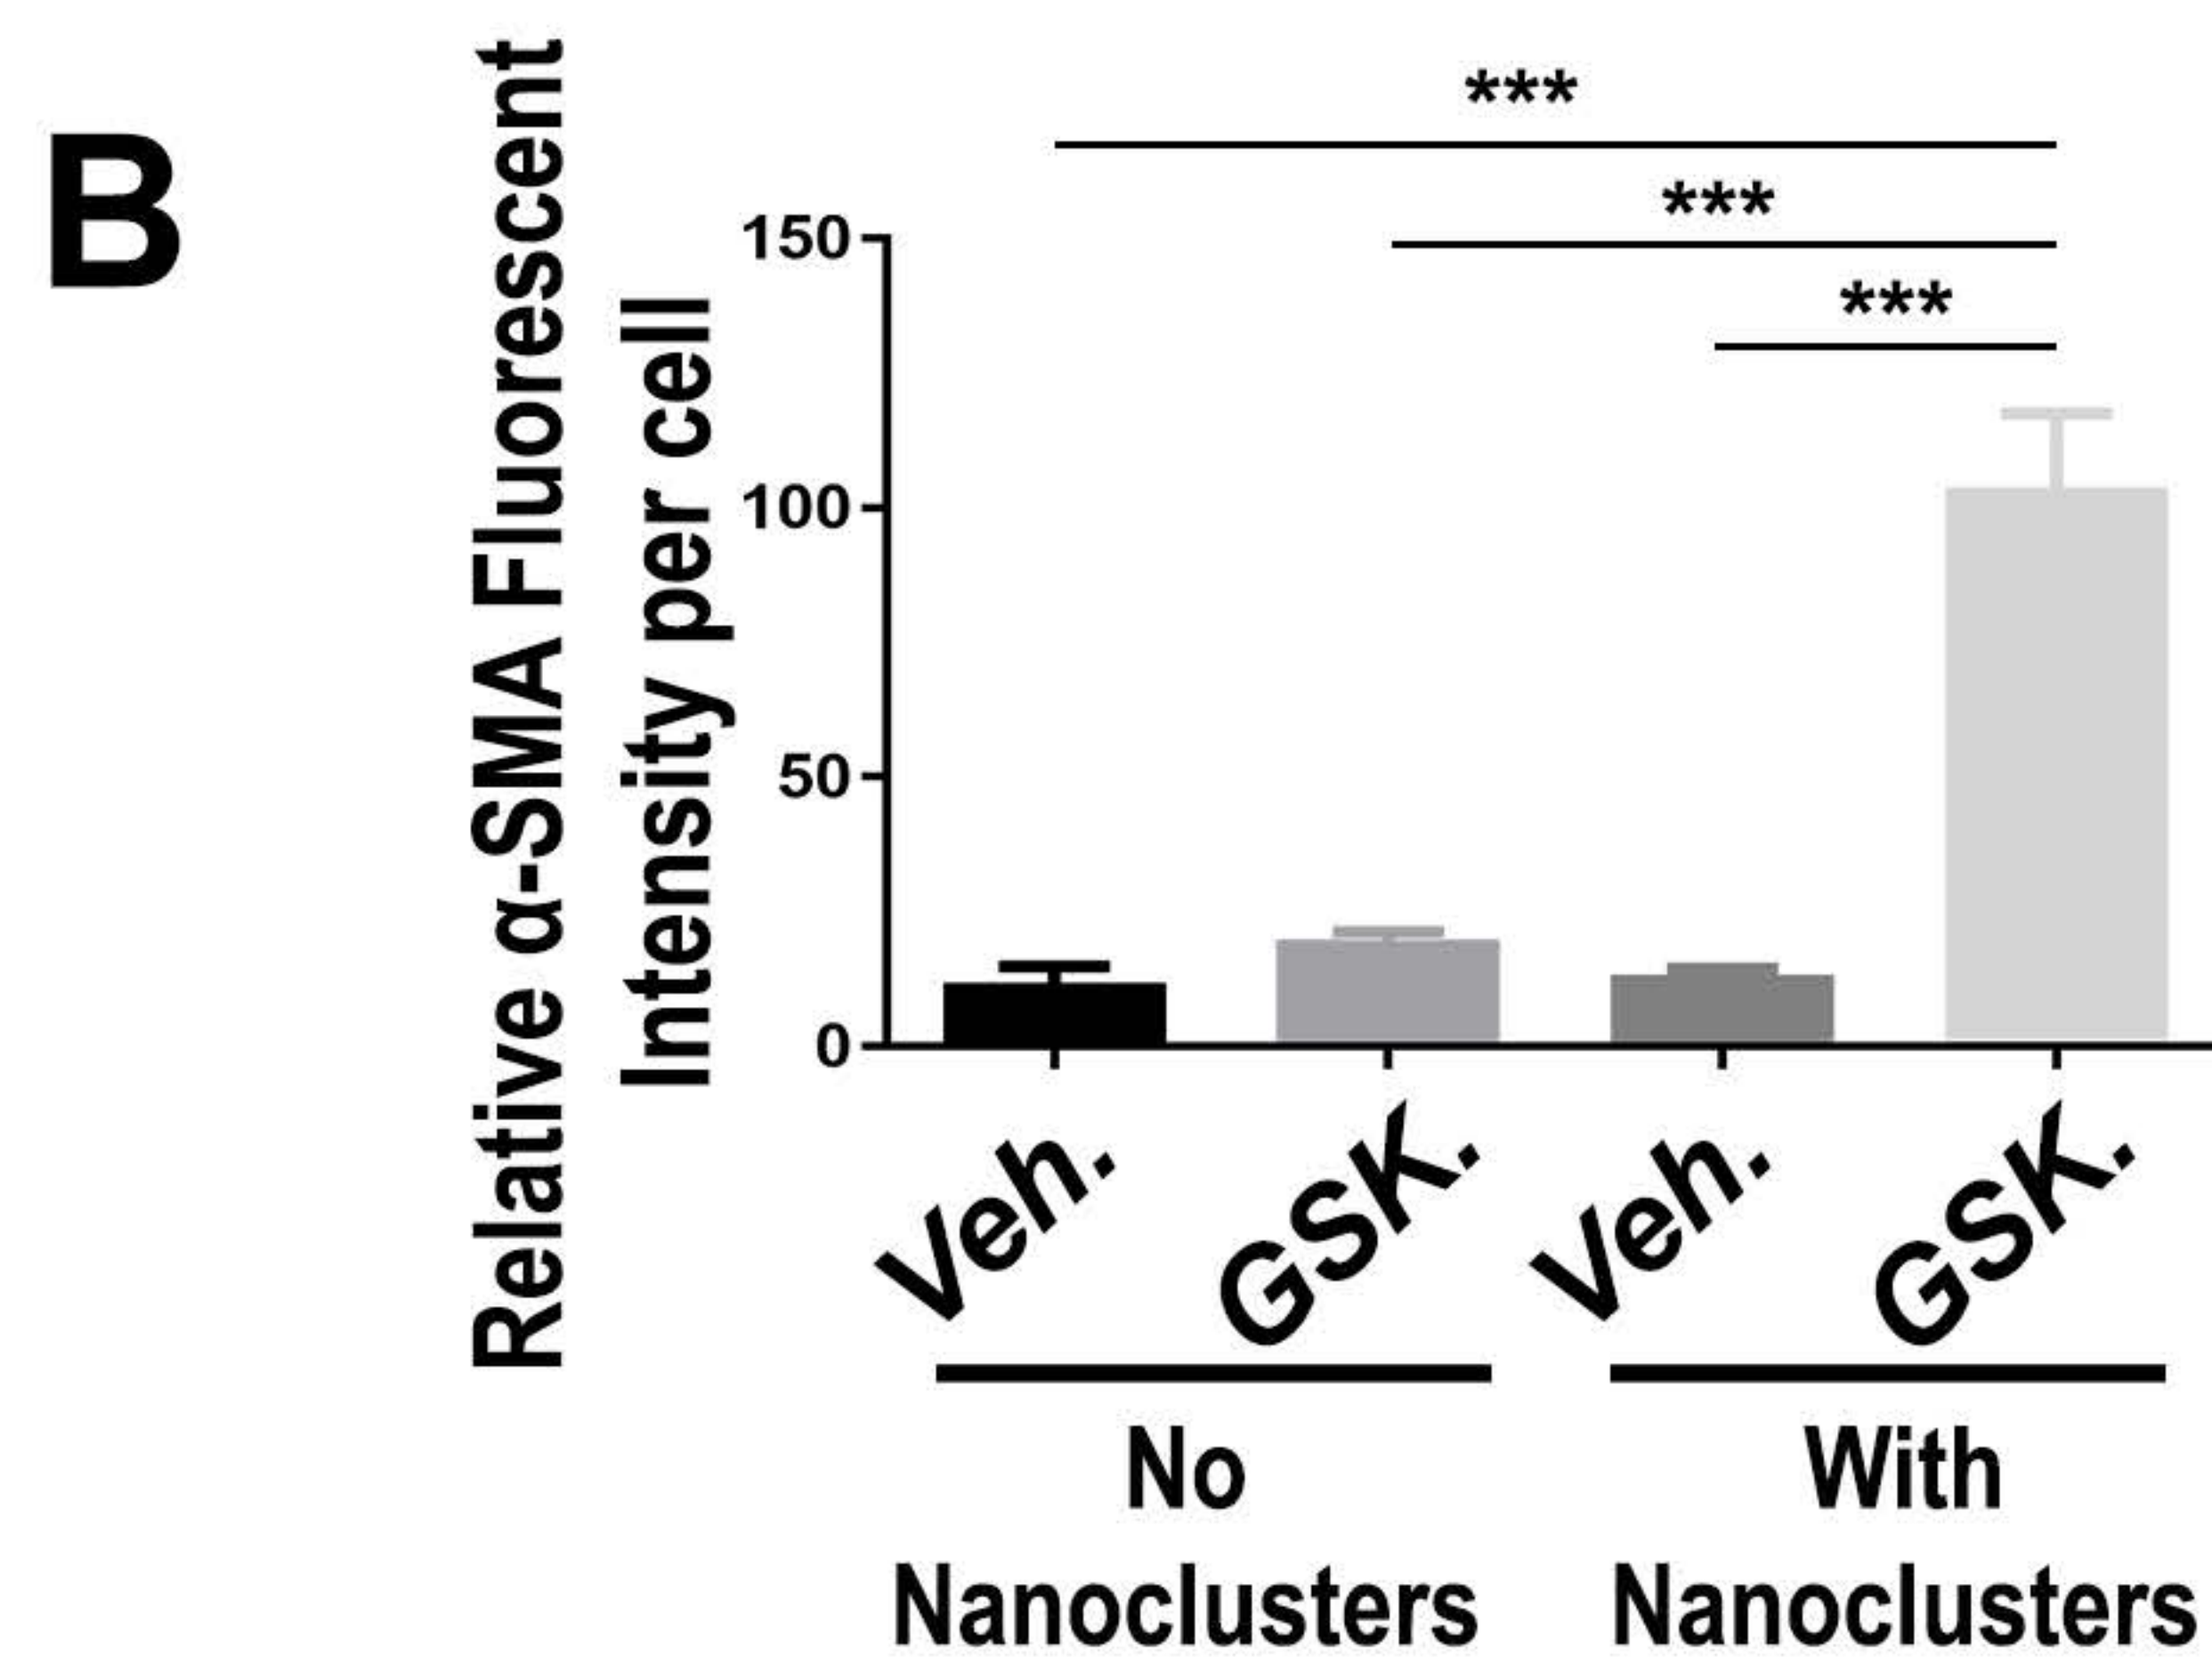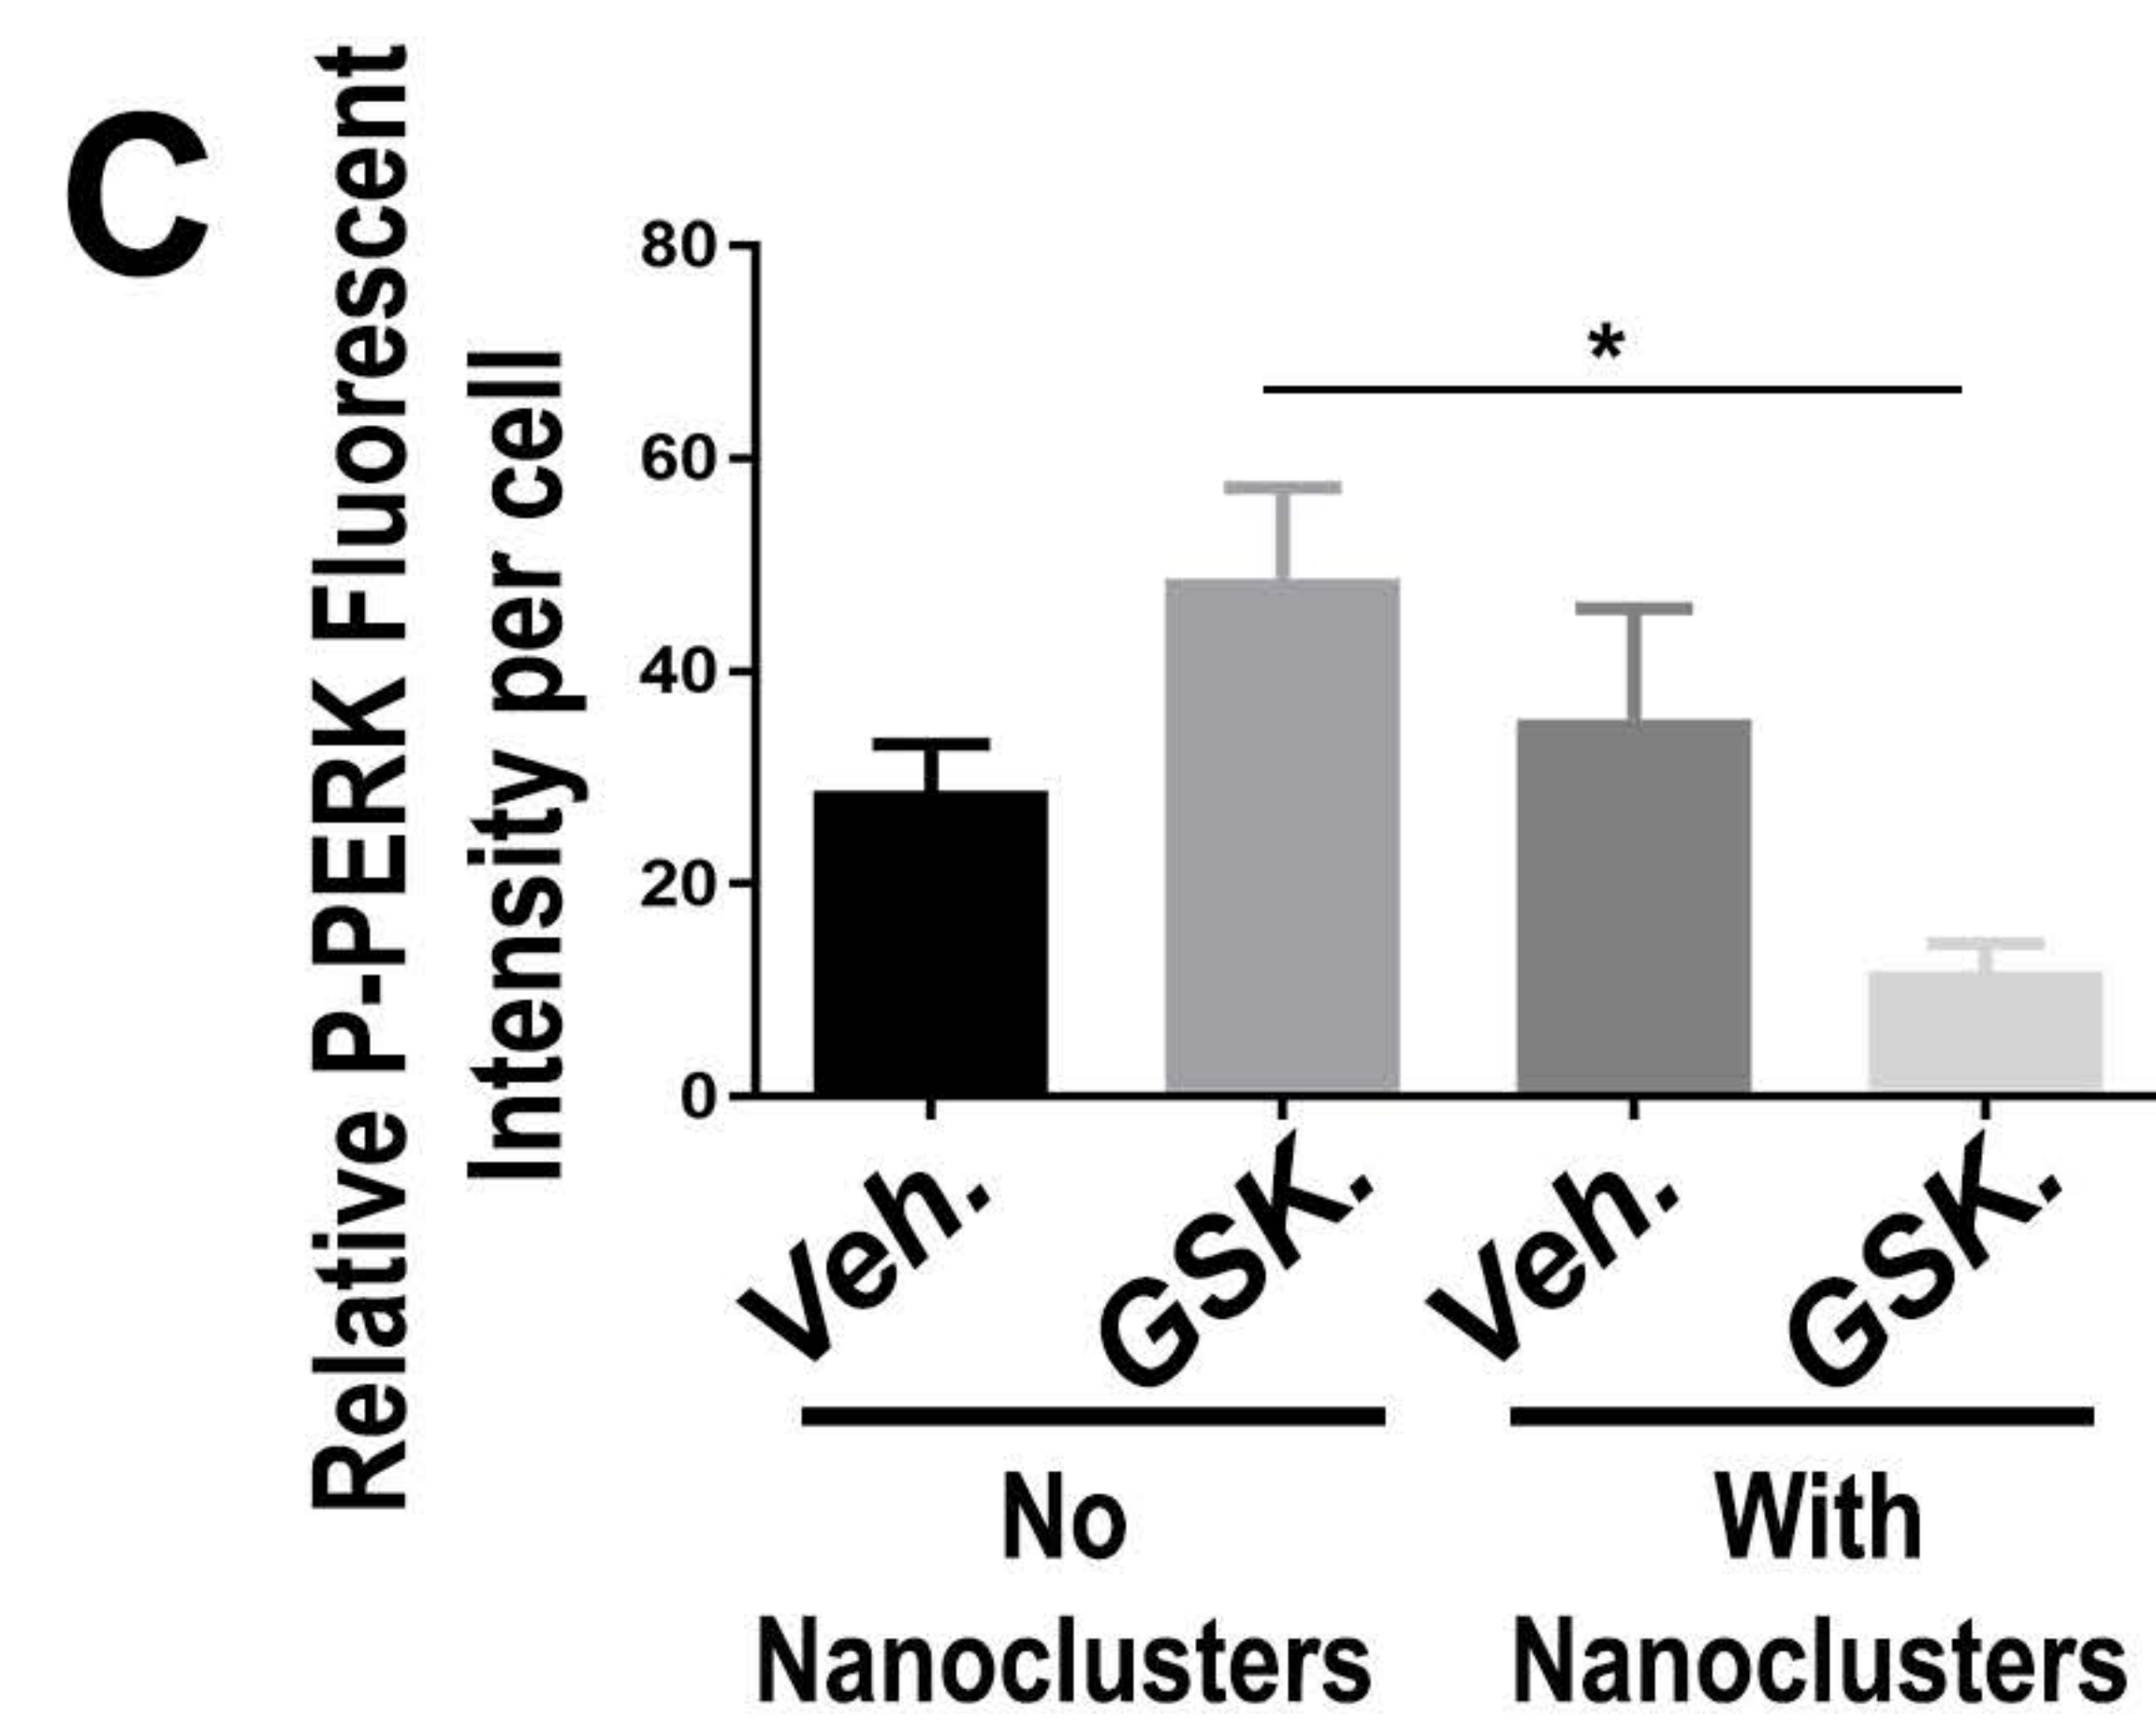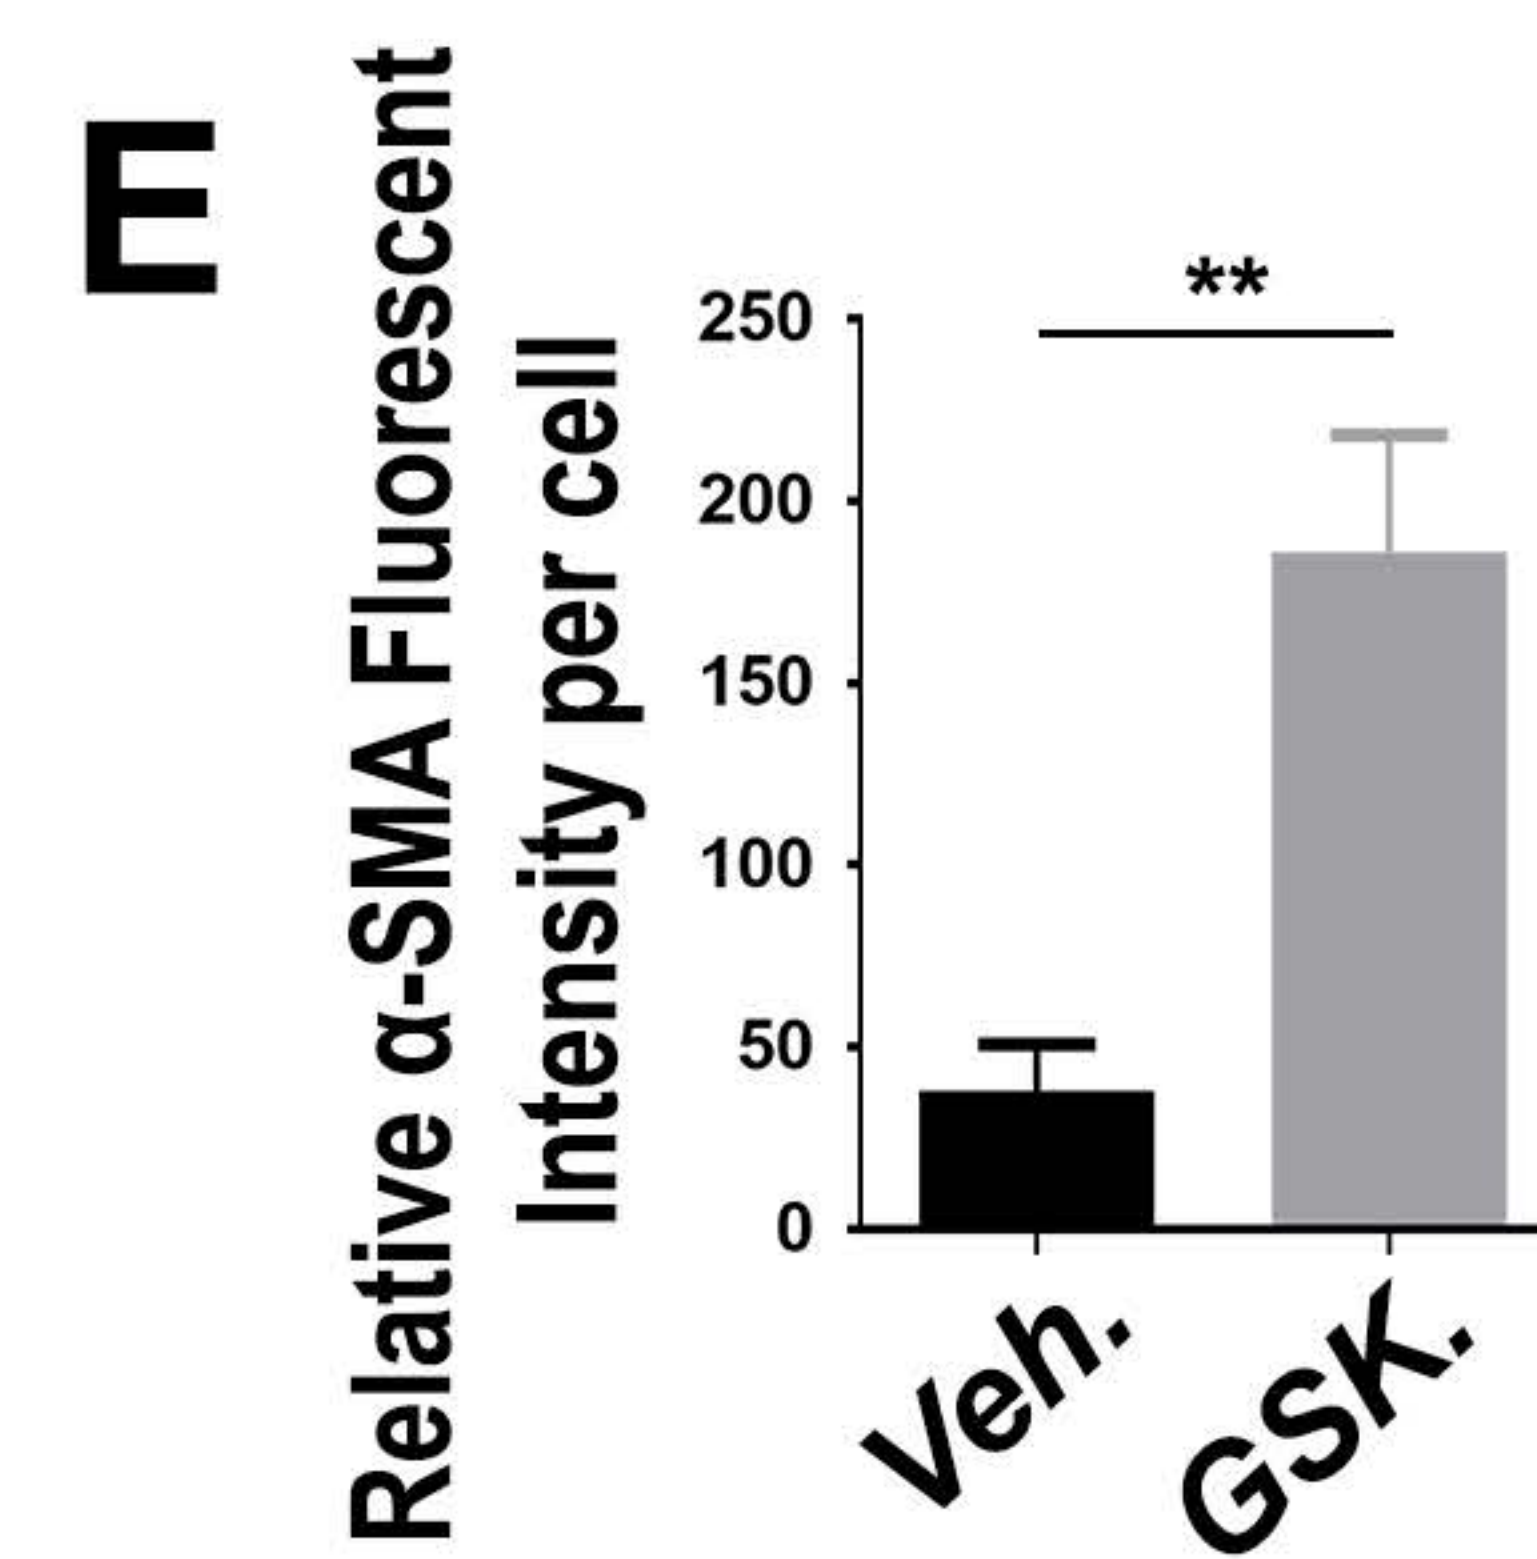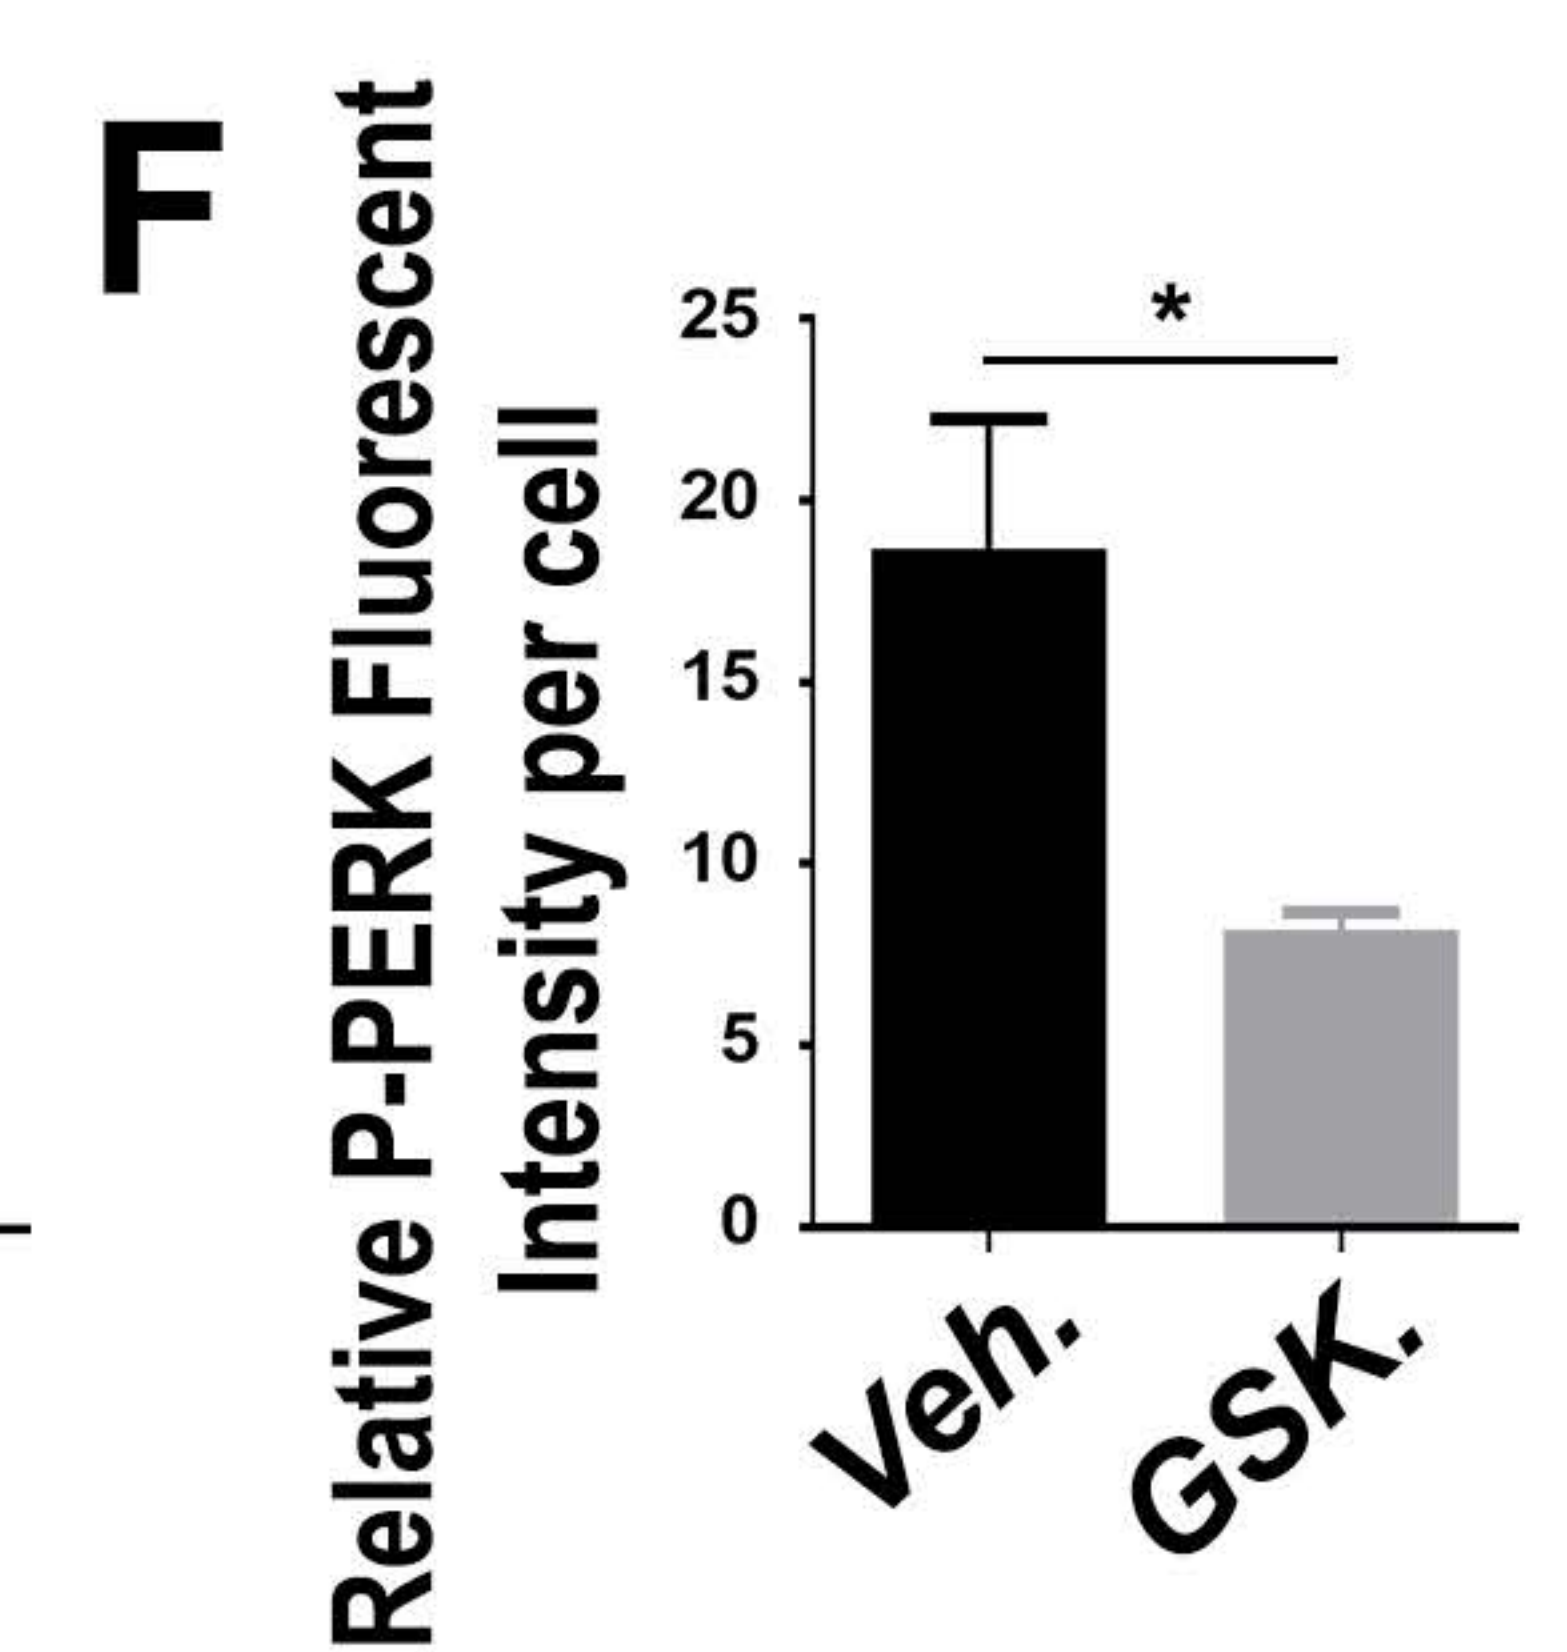

**A**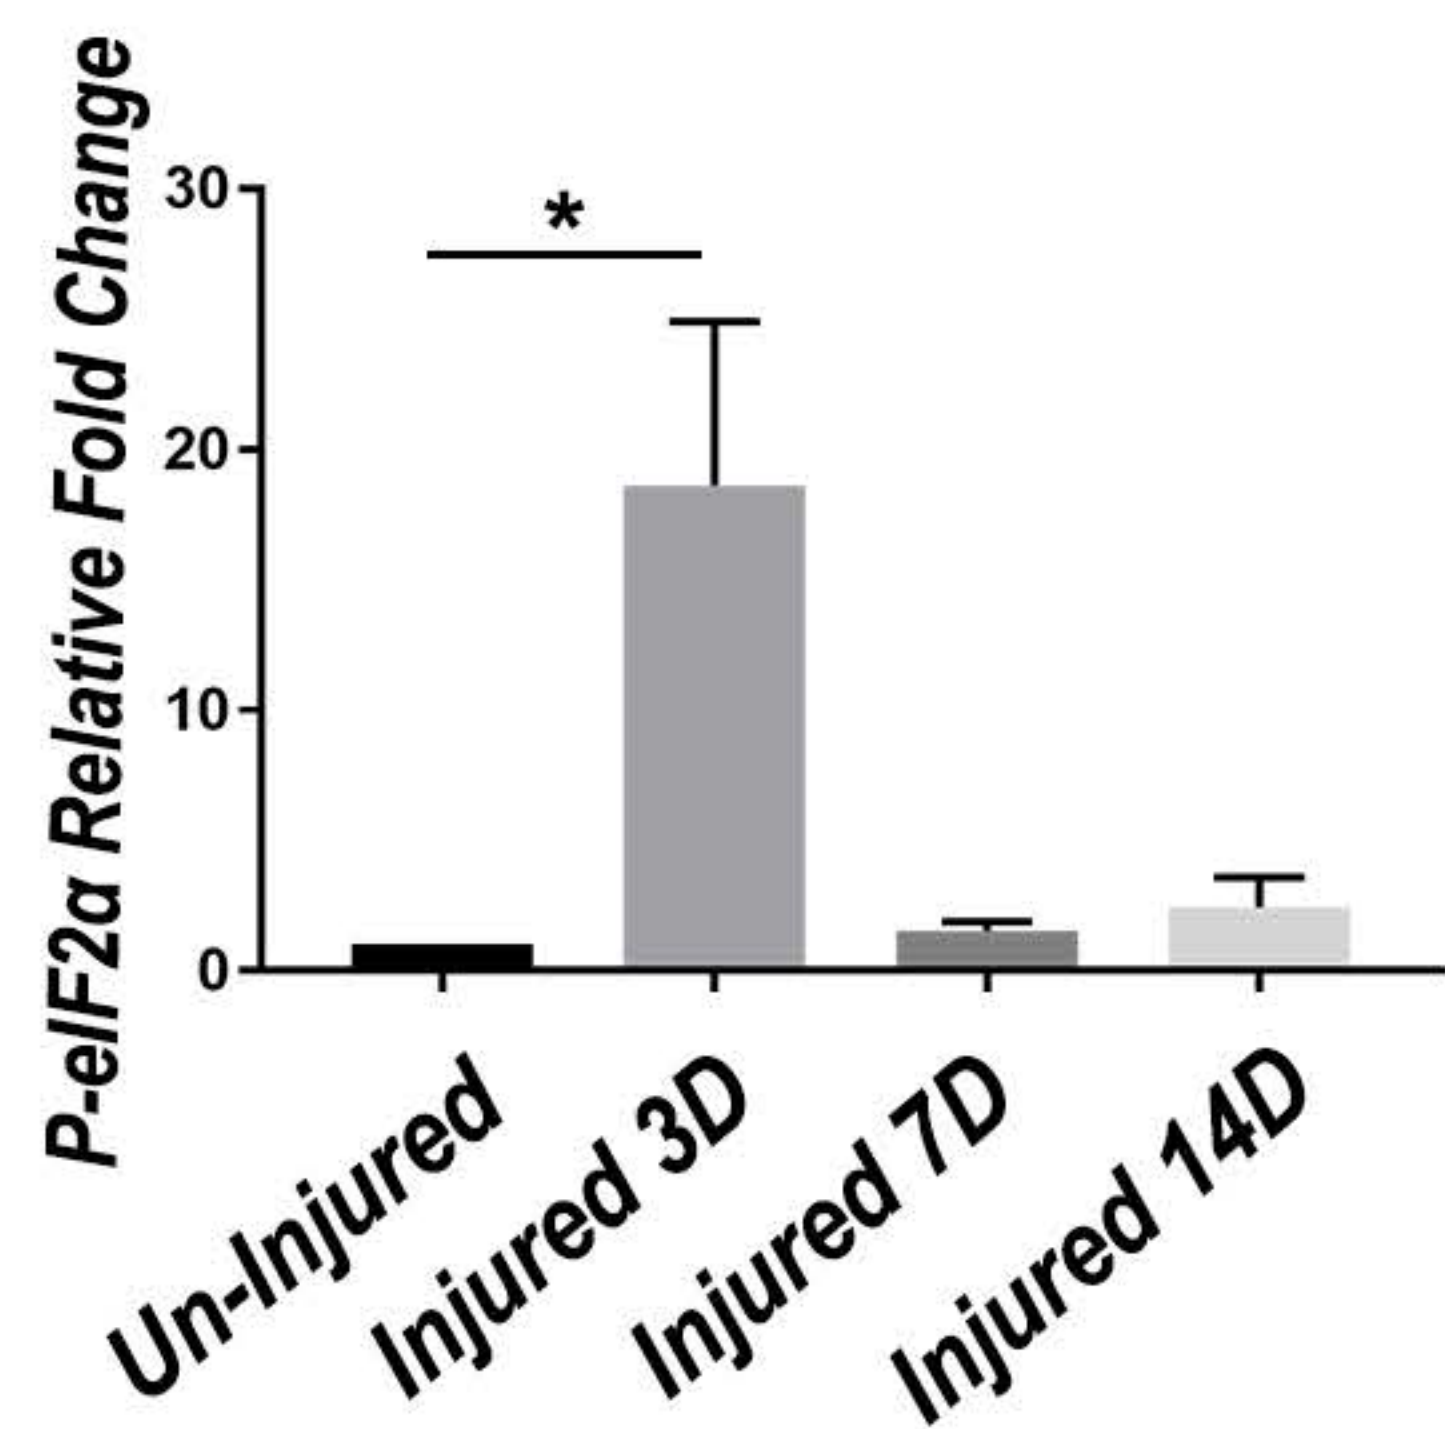**B**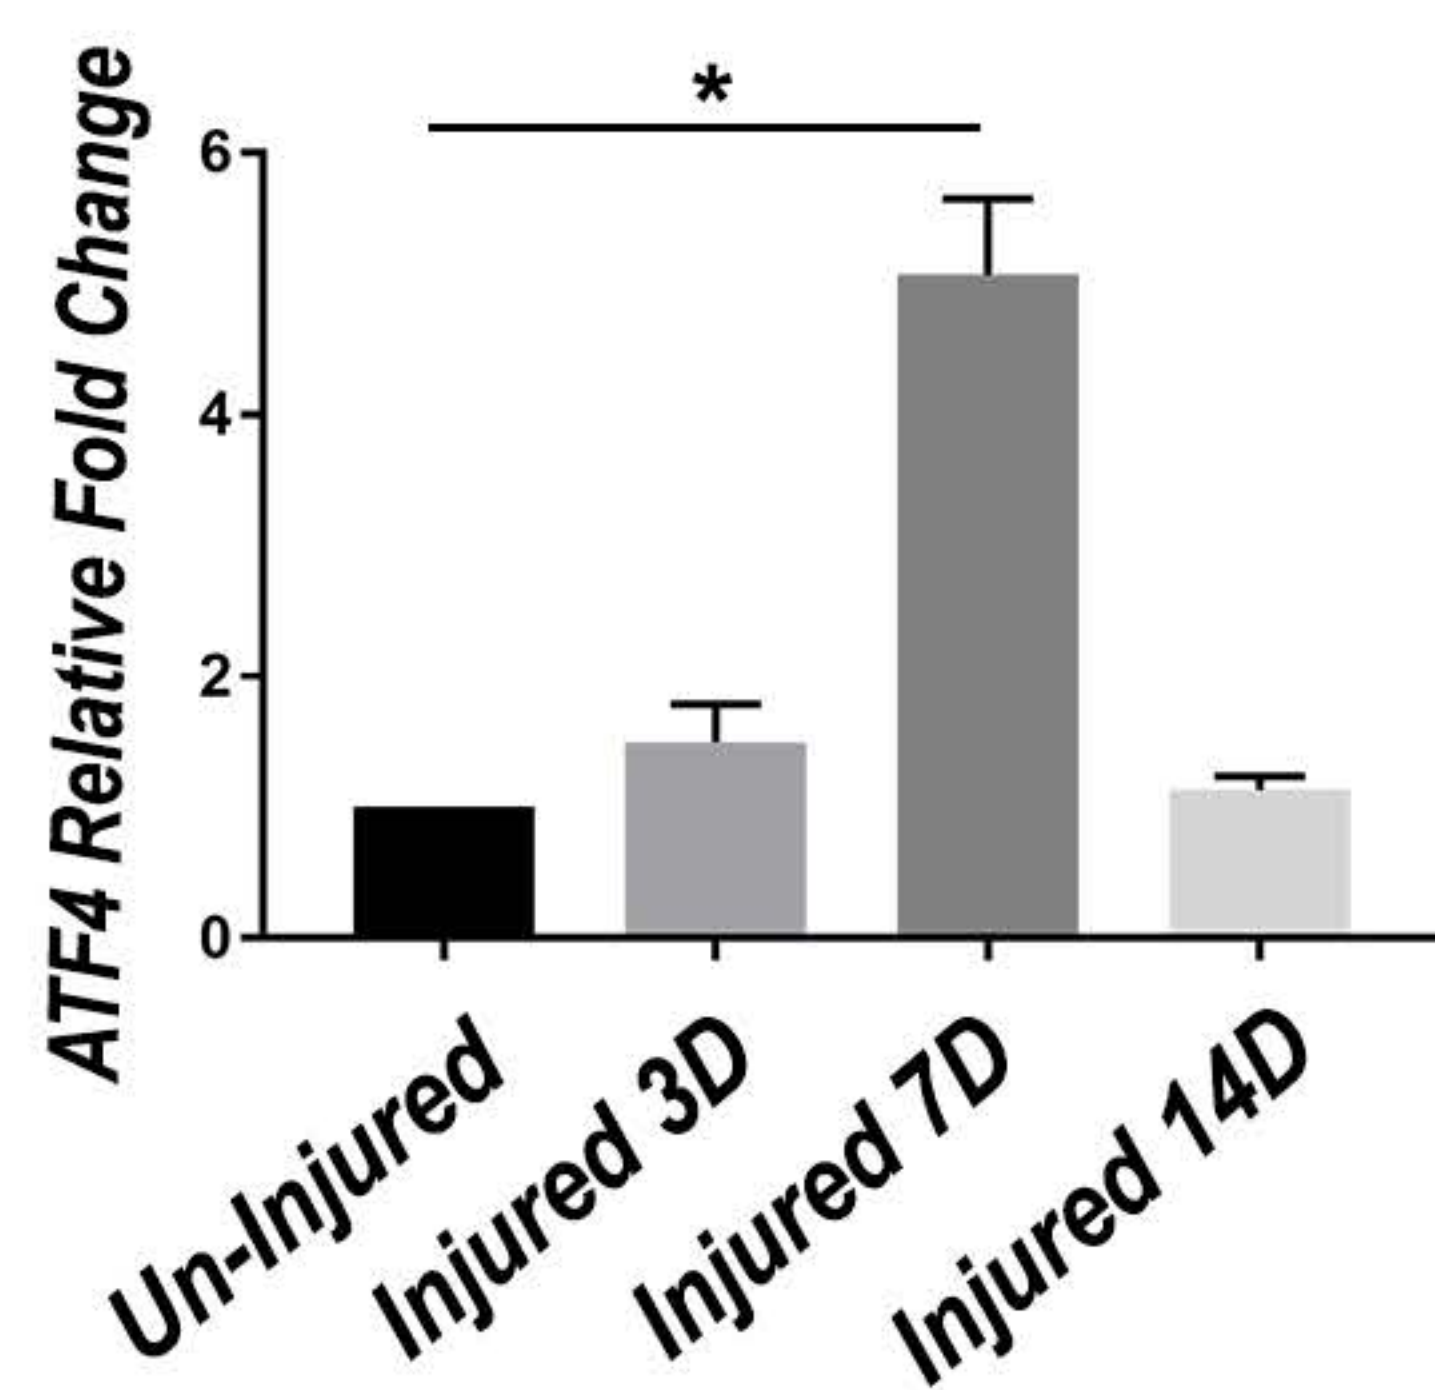**C**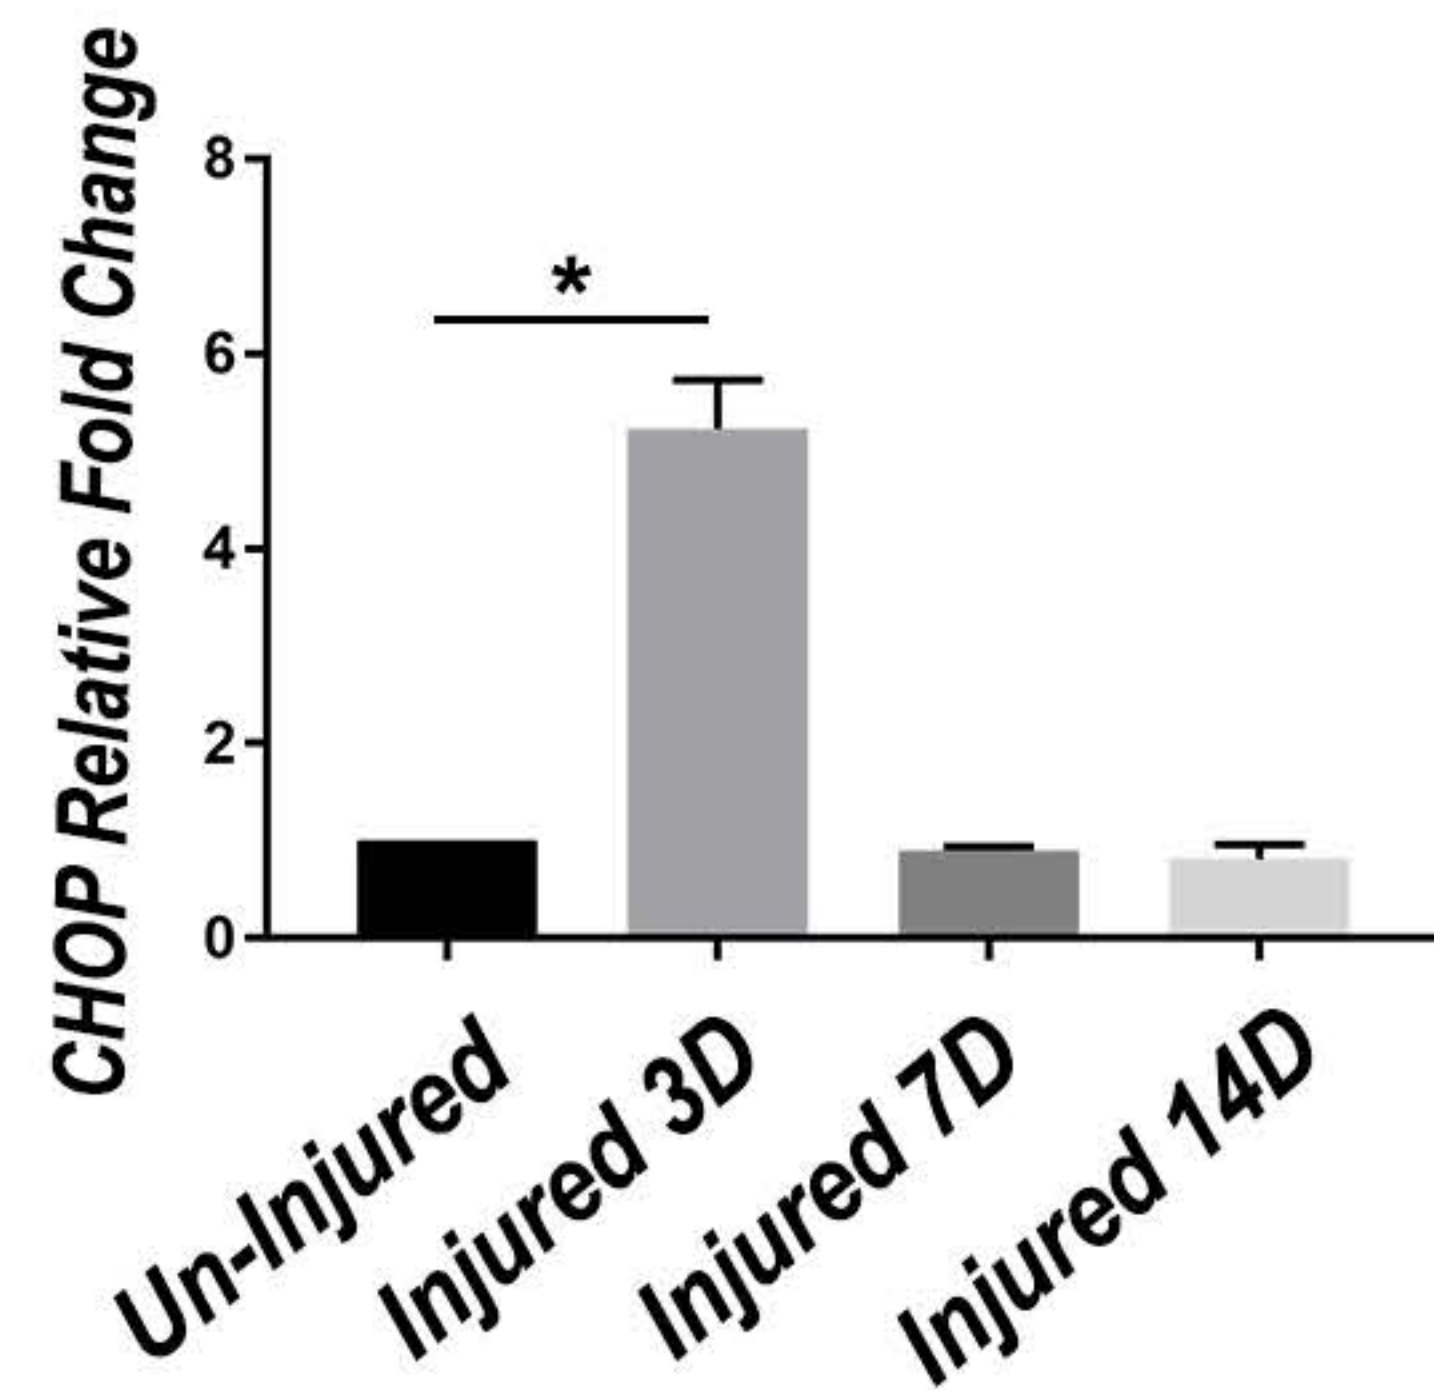**D**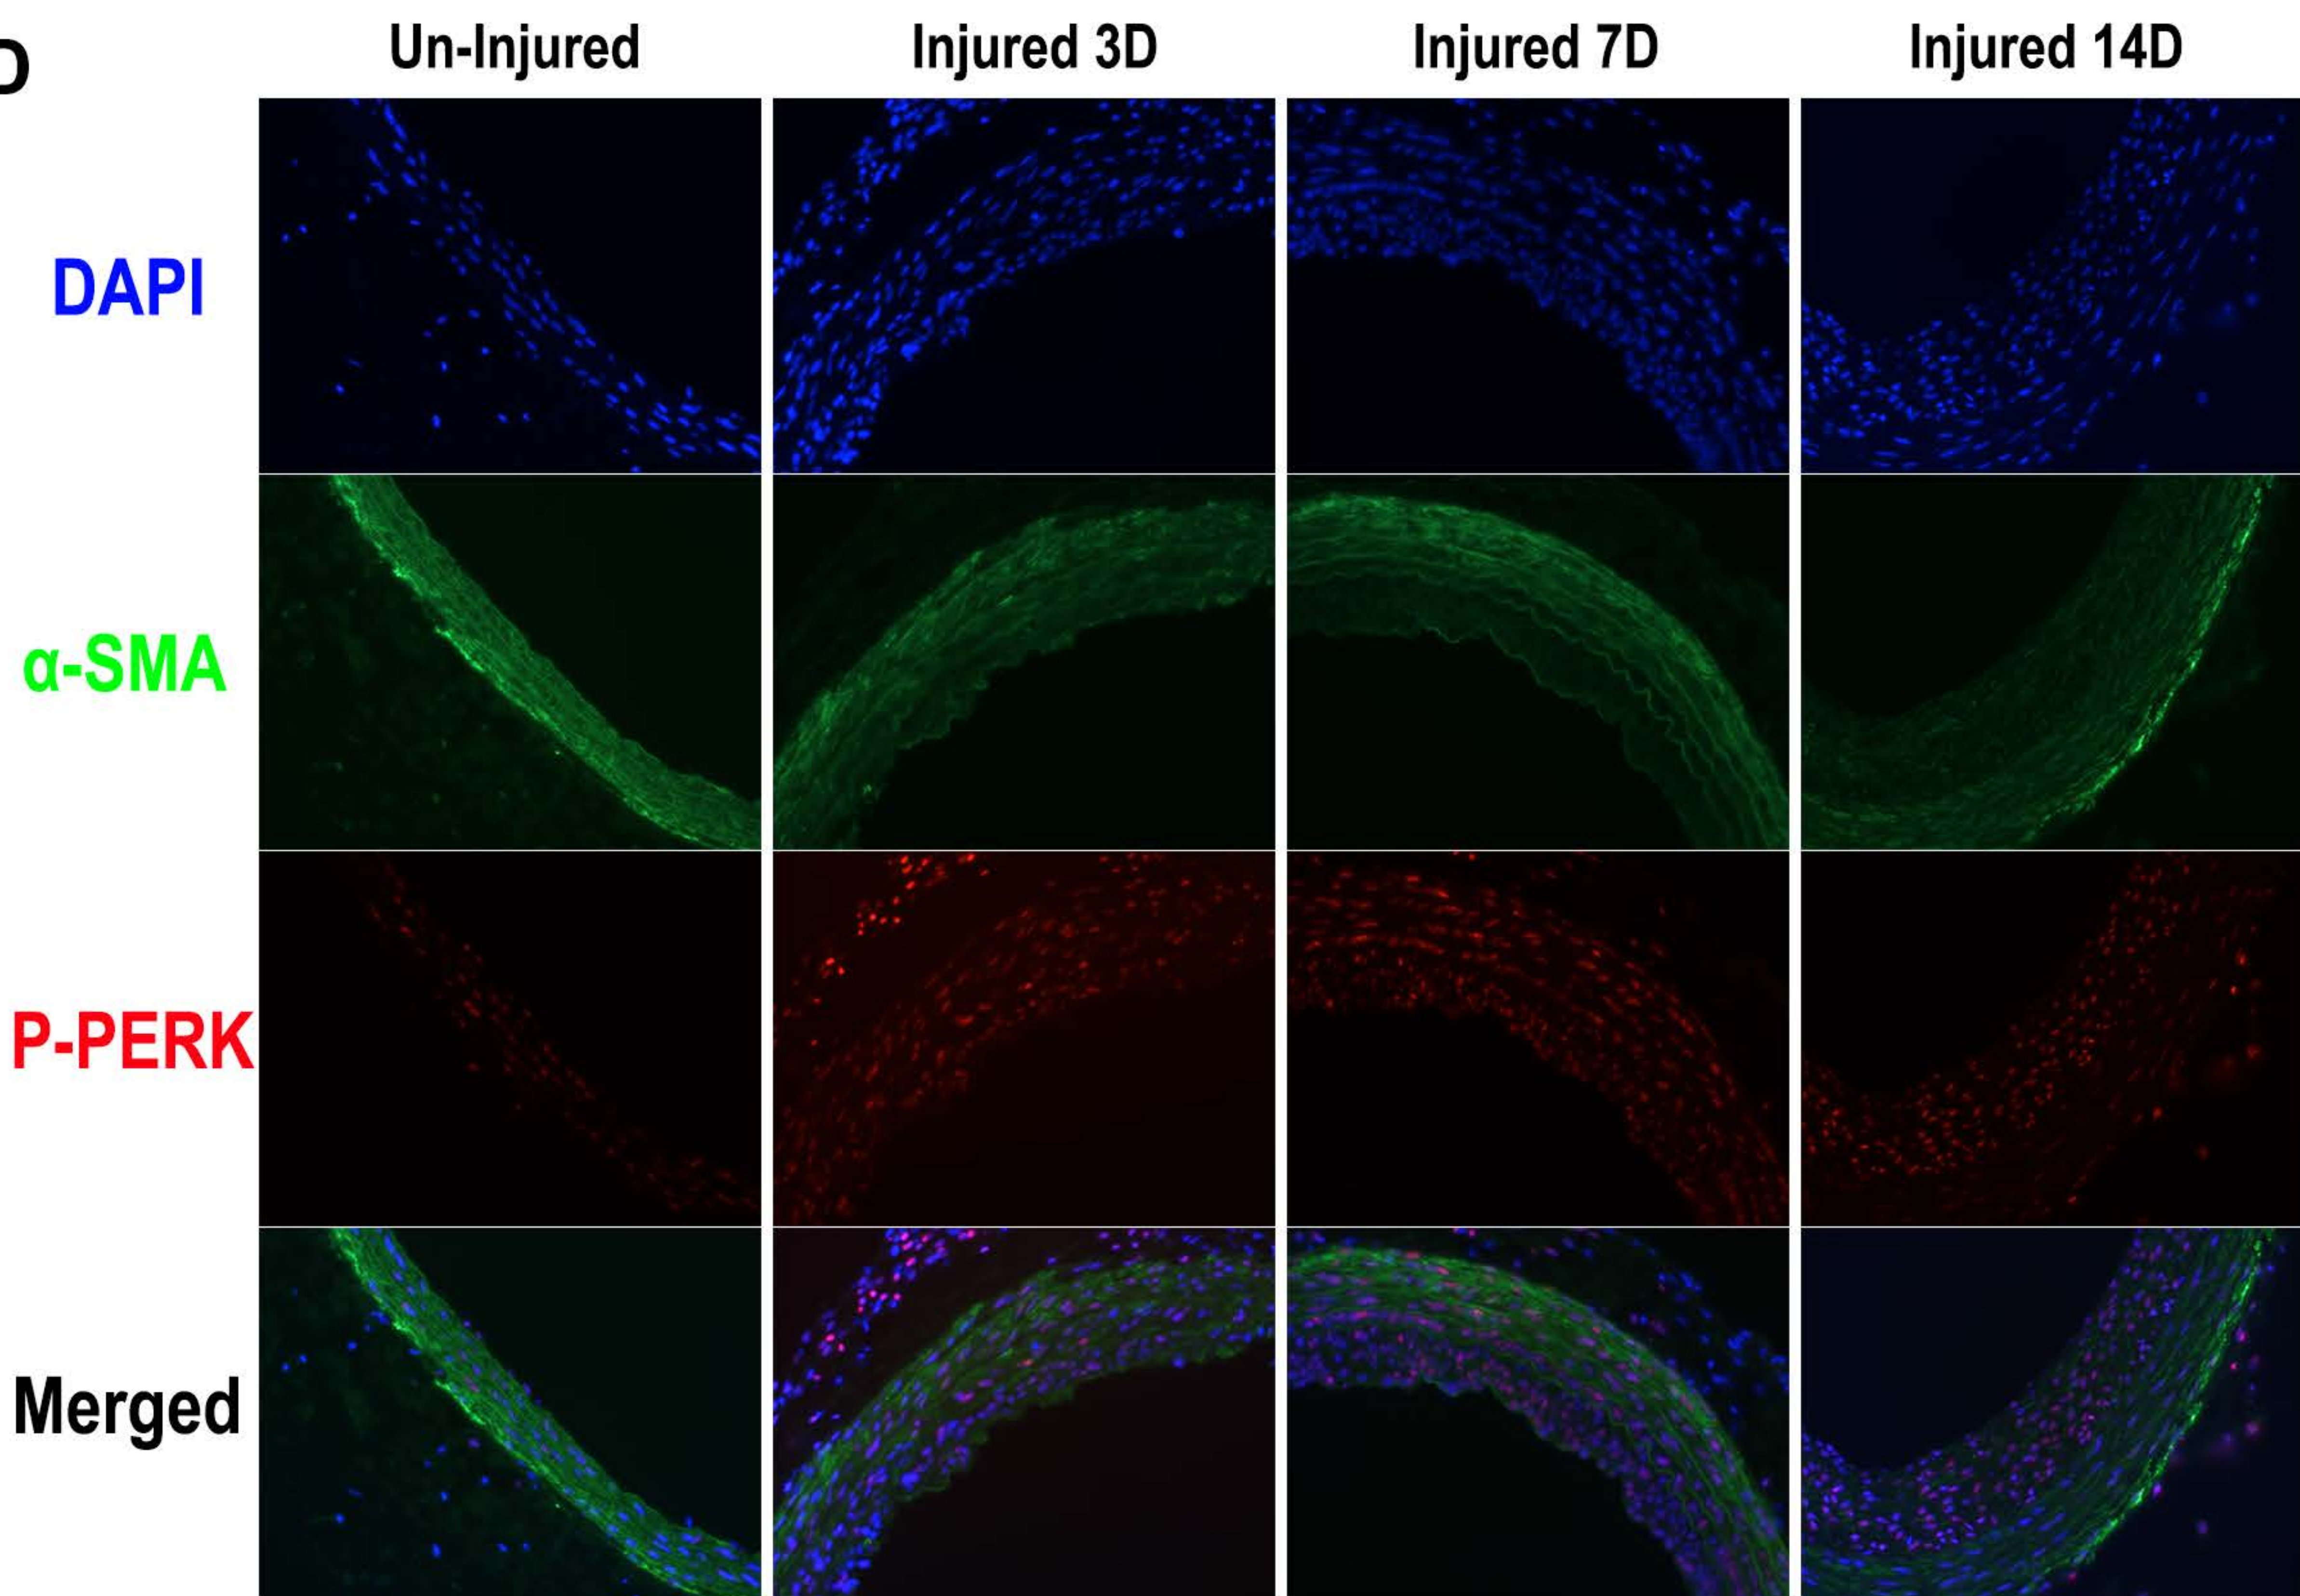**E**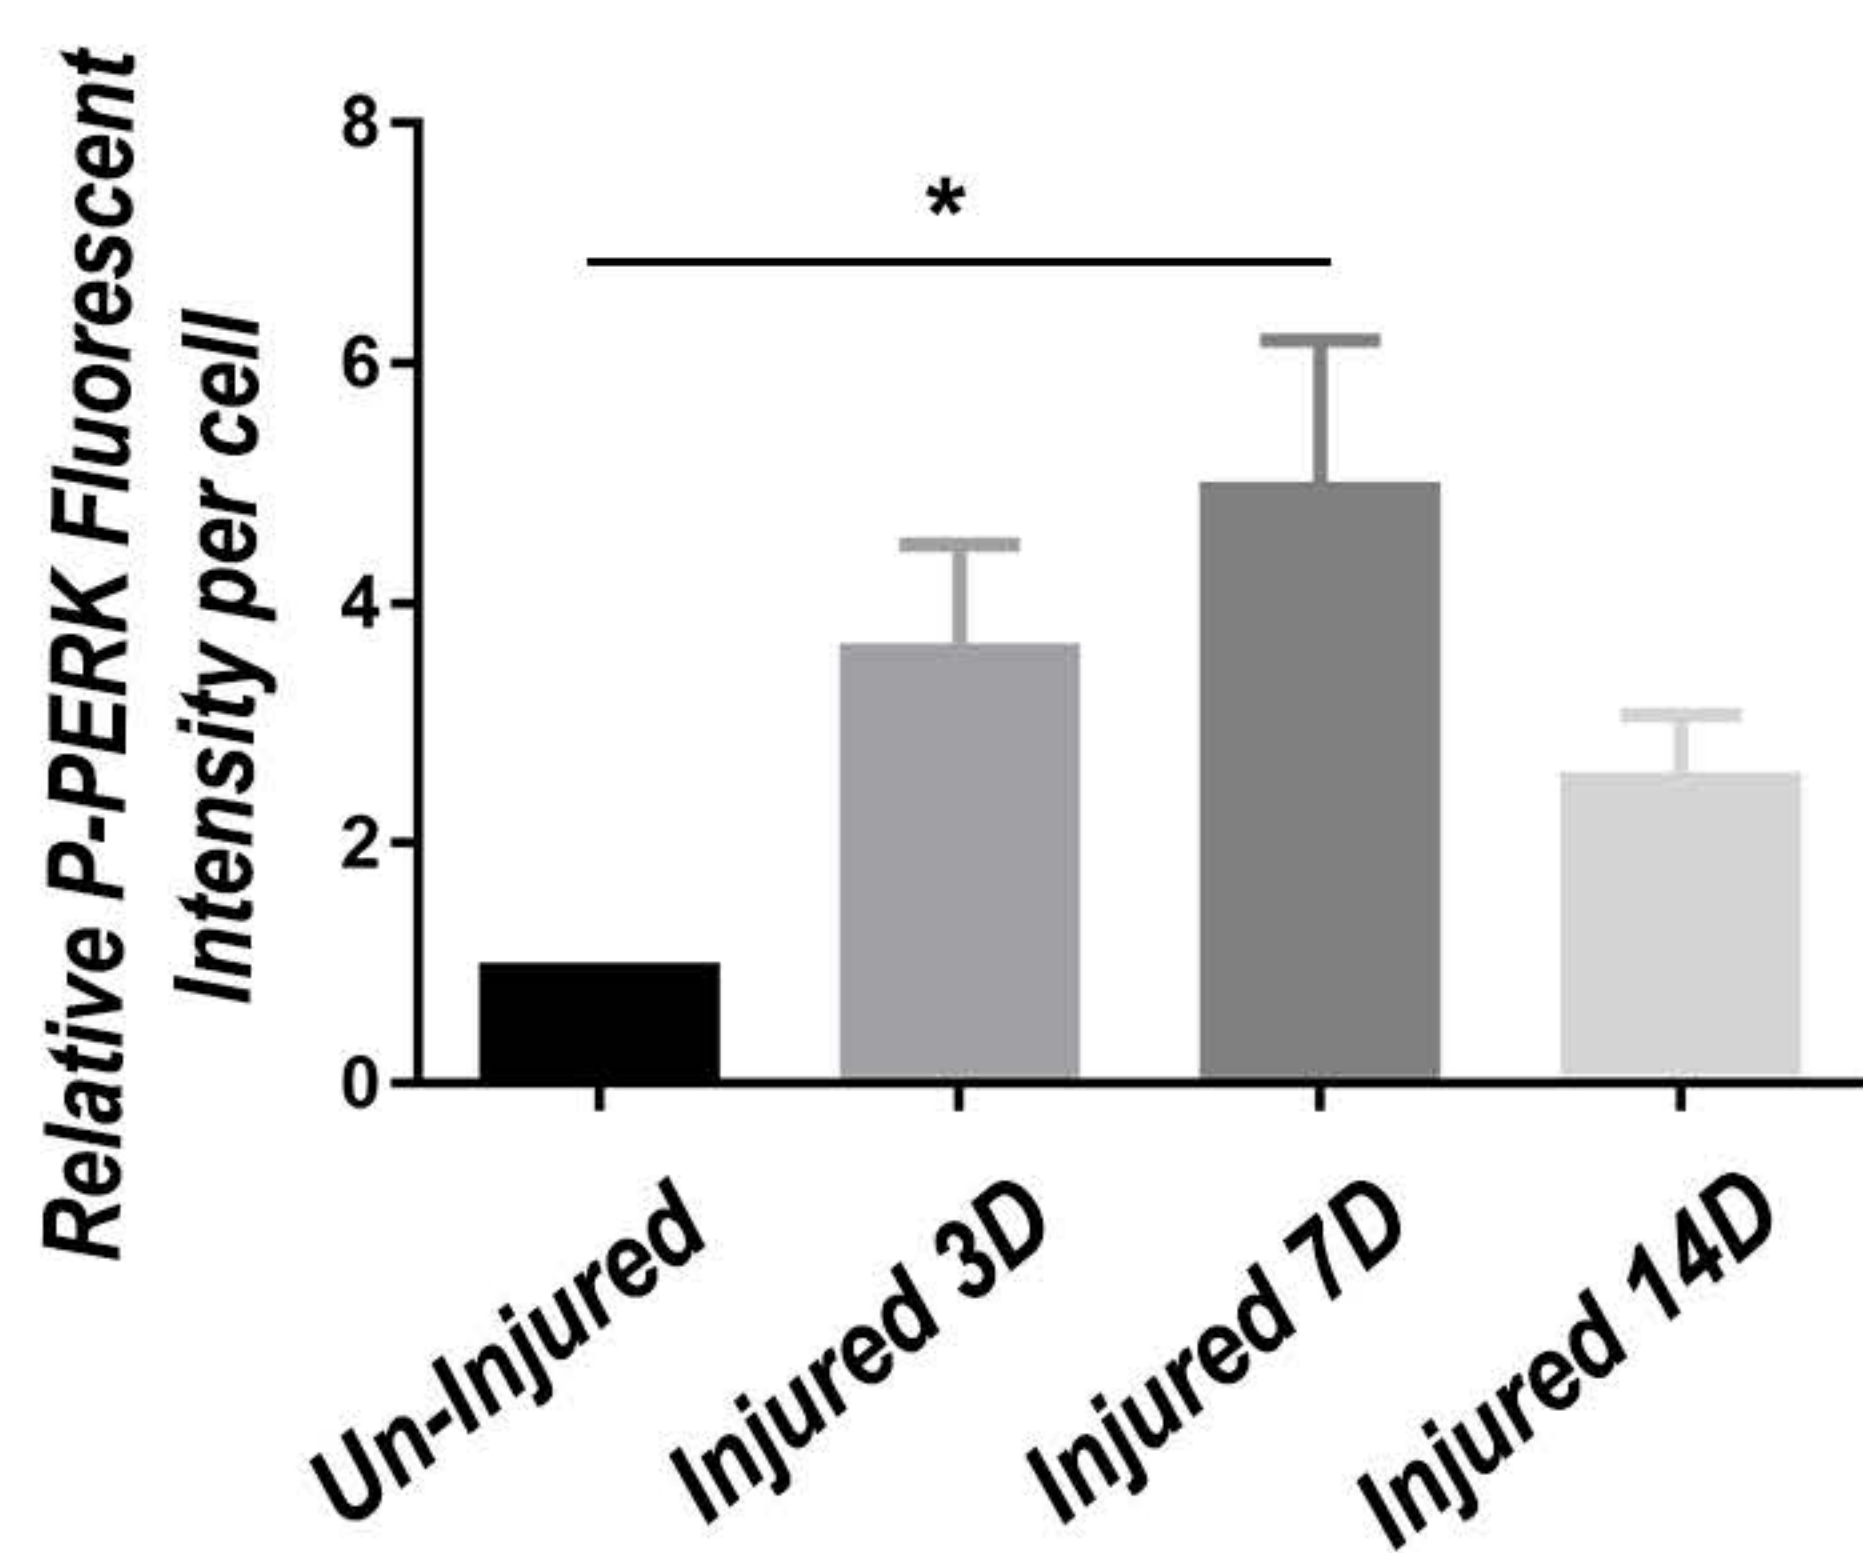**F**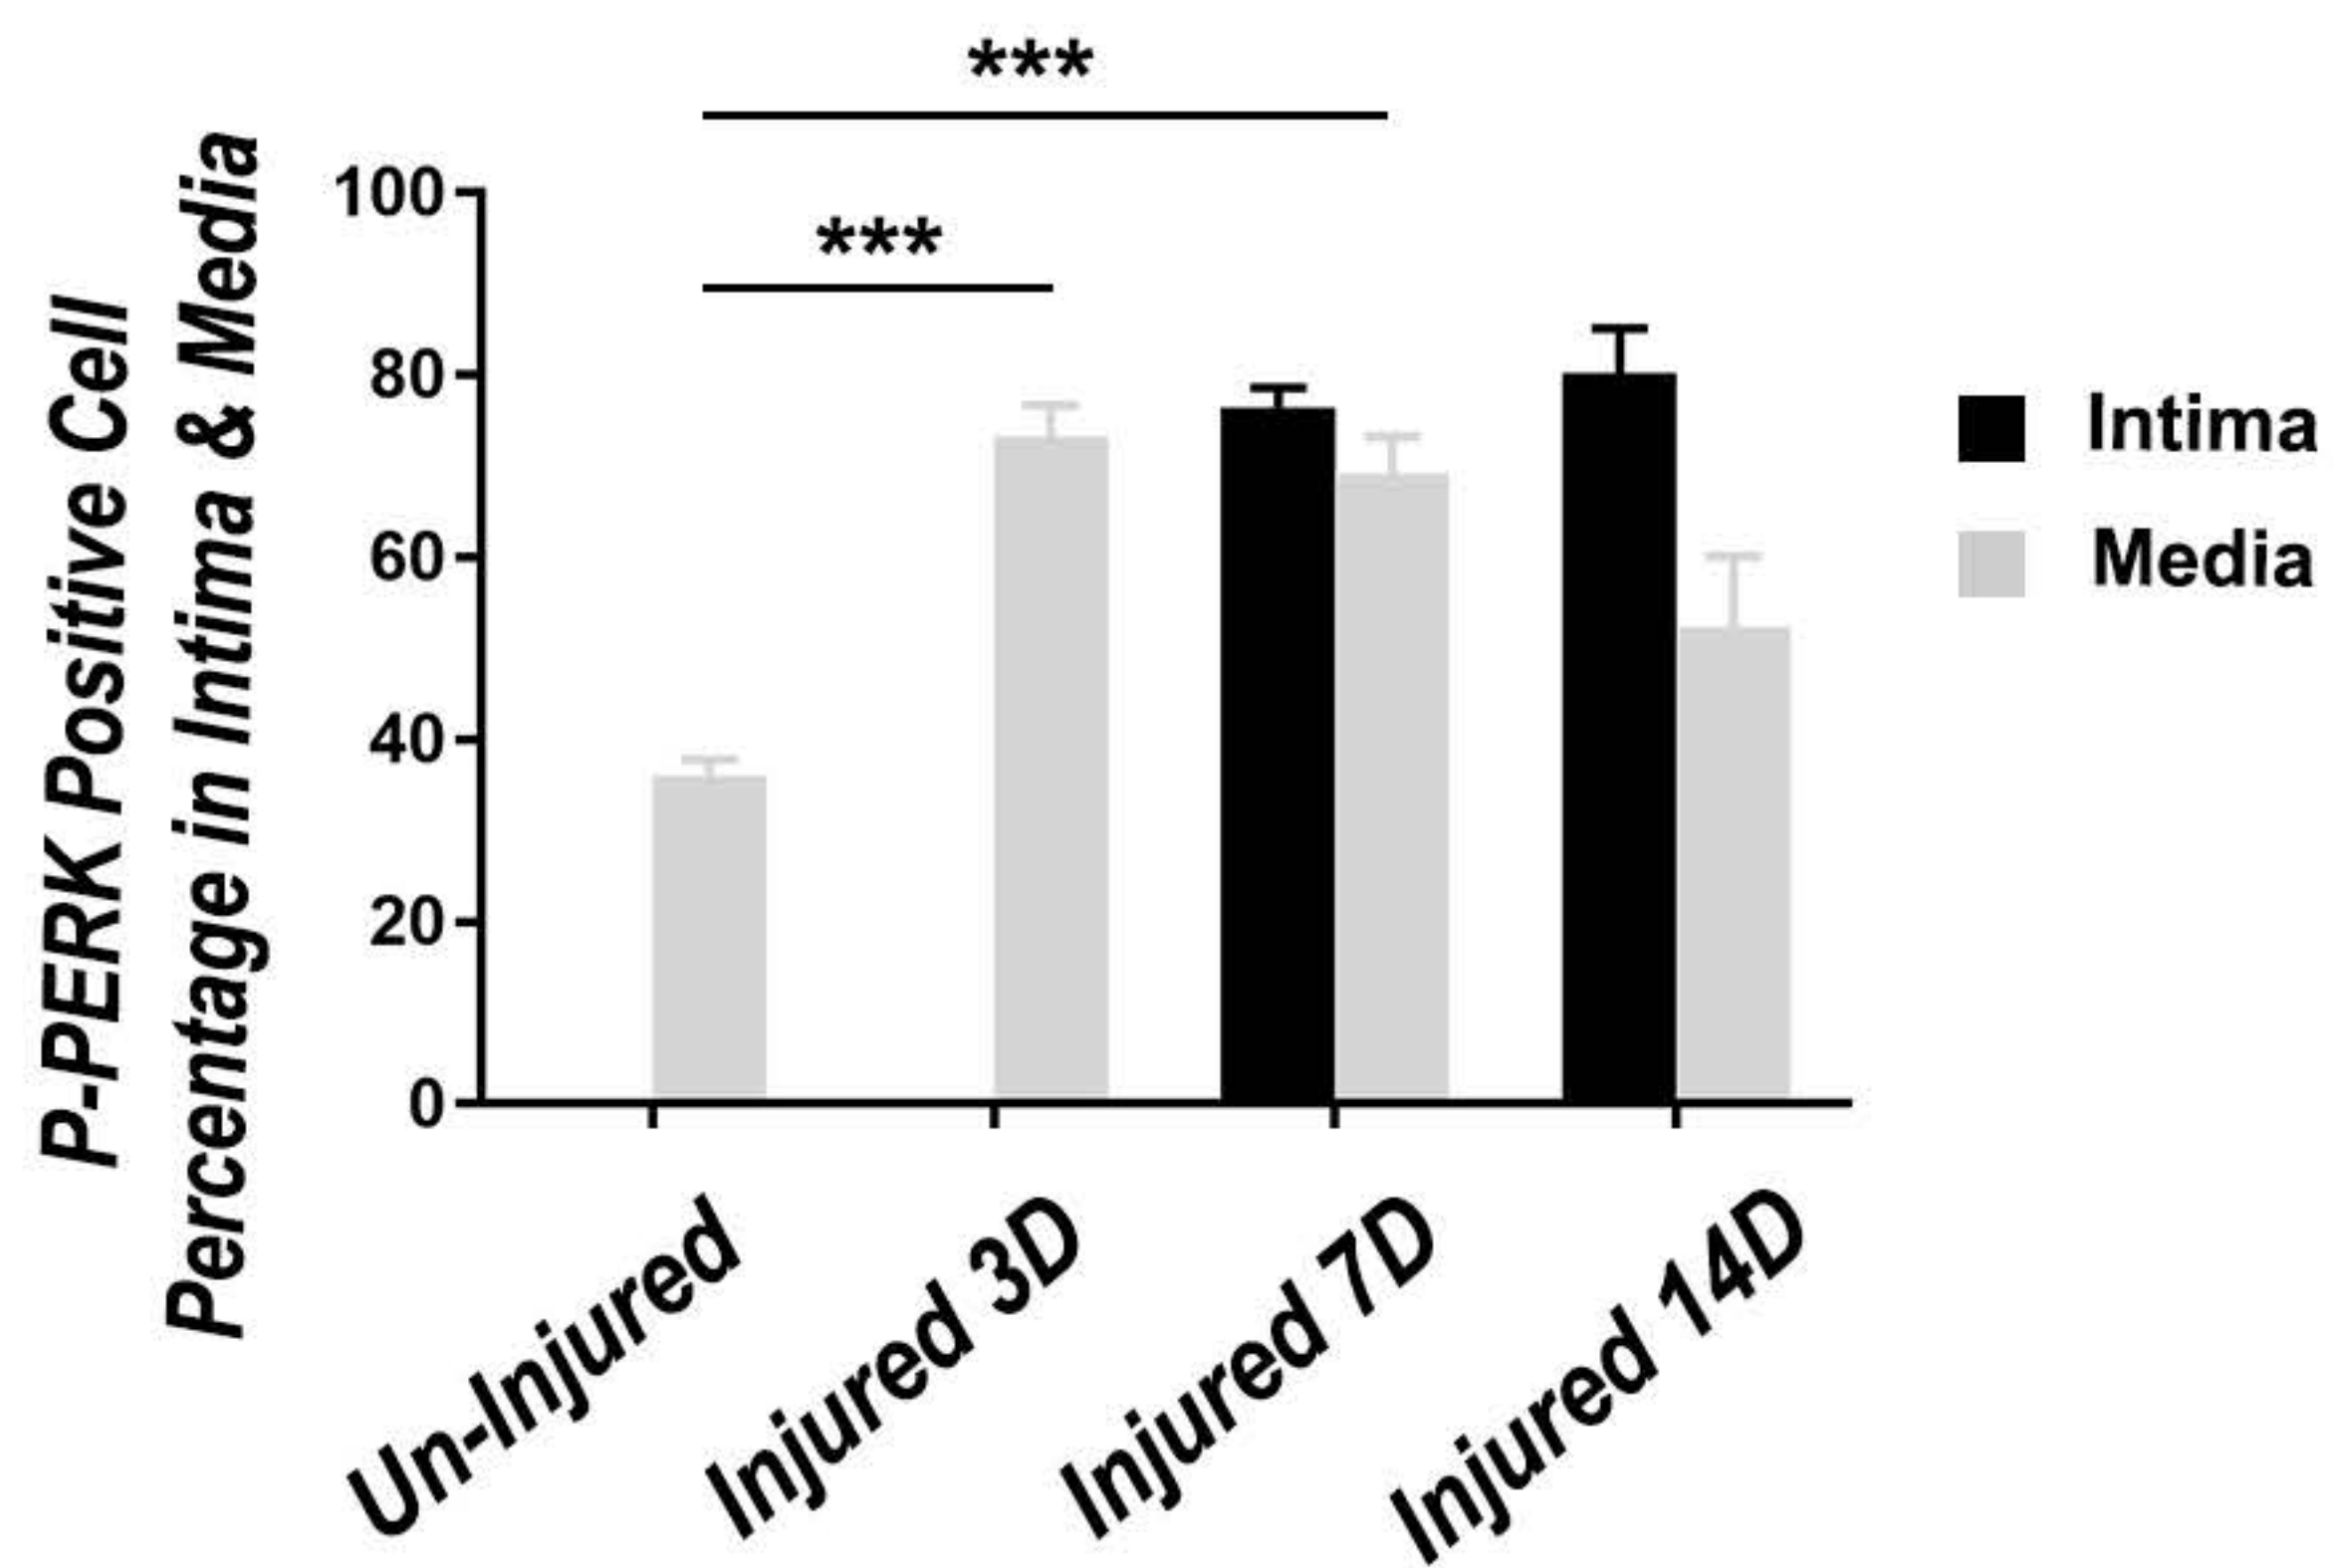

**A**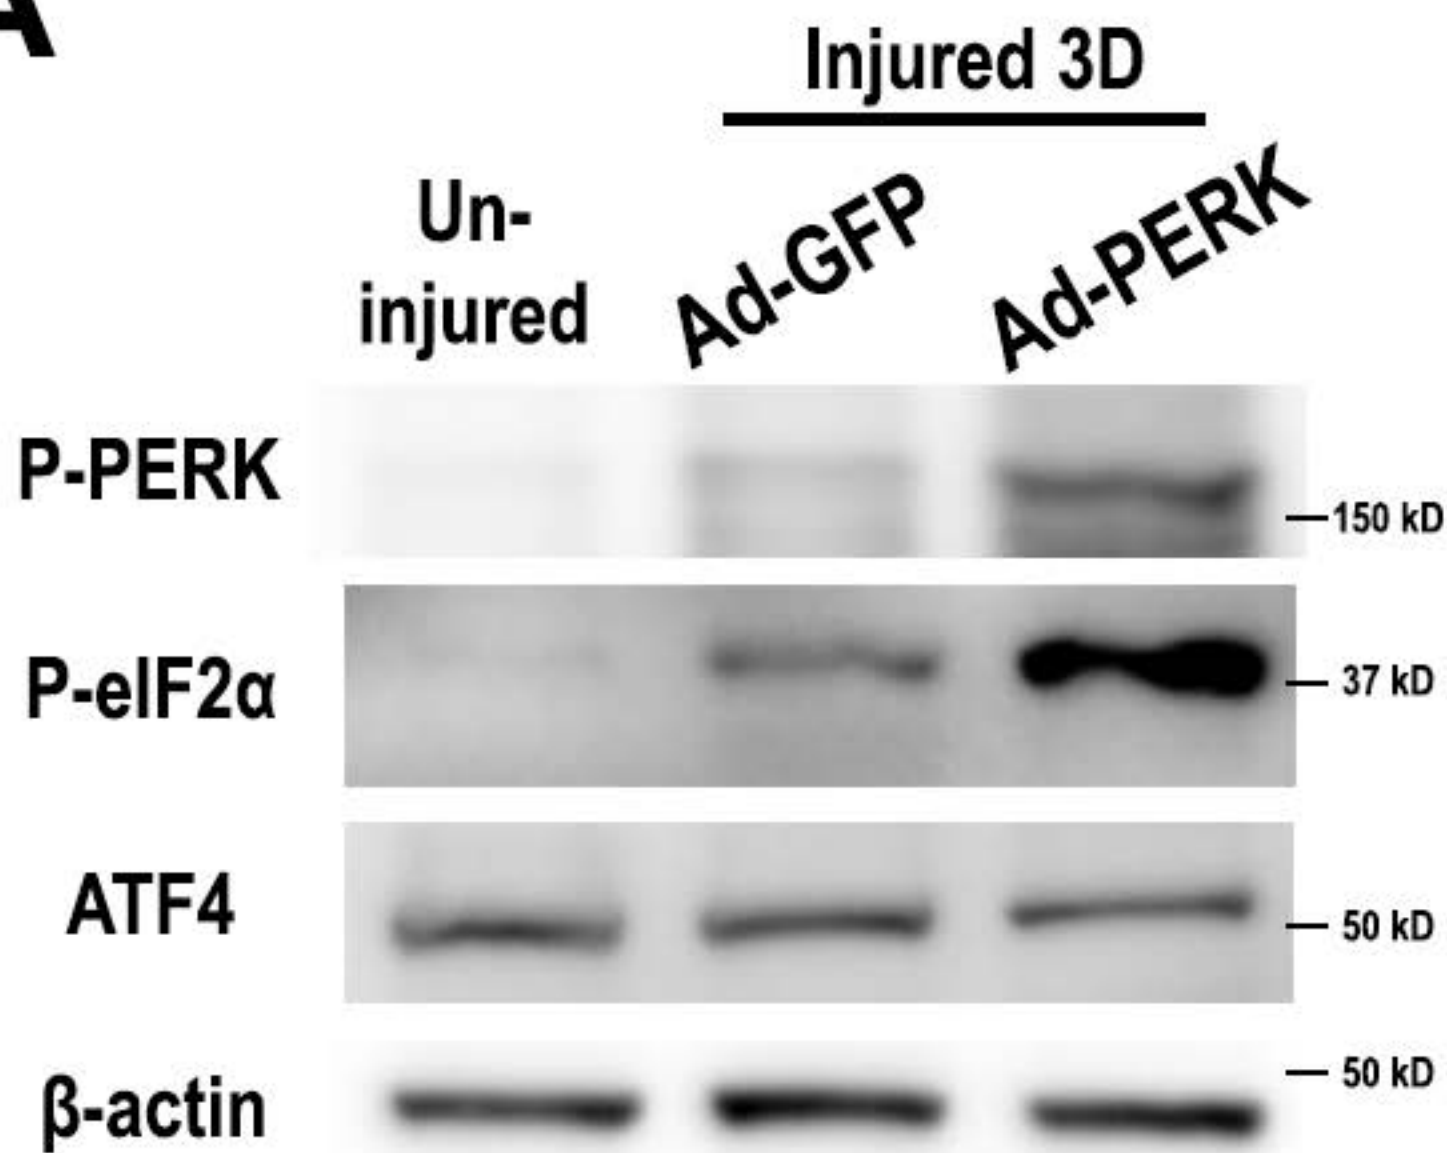**B**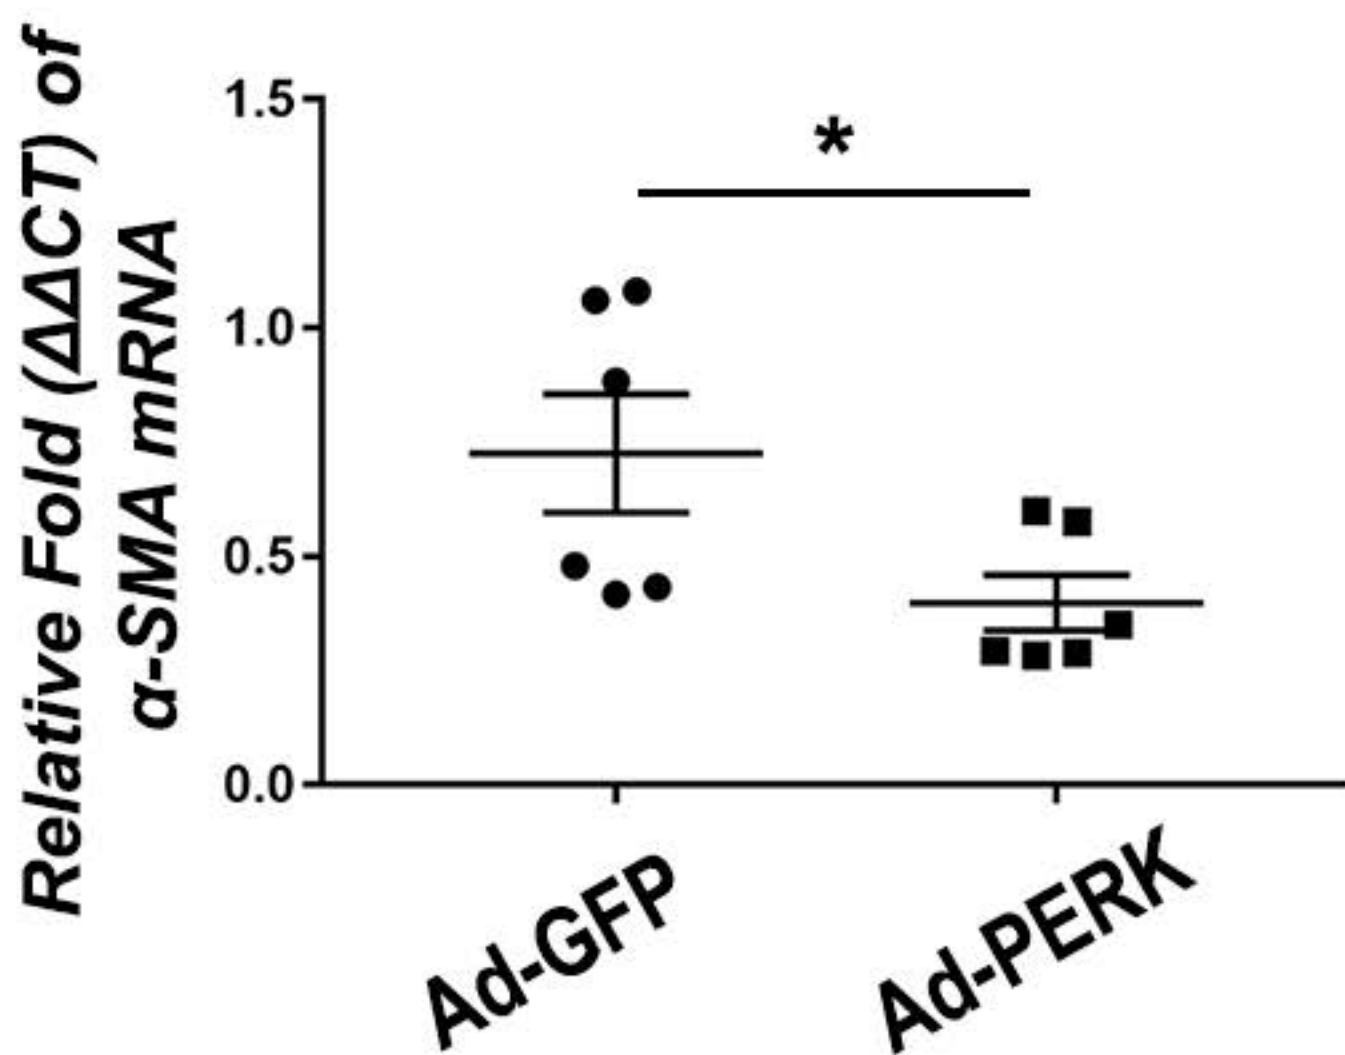

**A**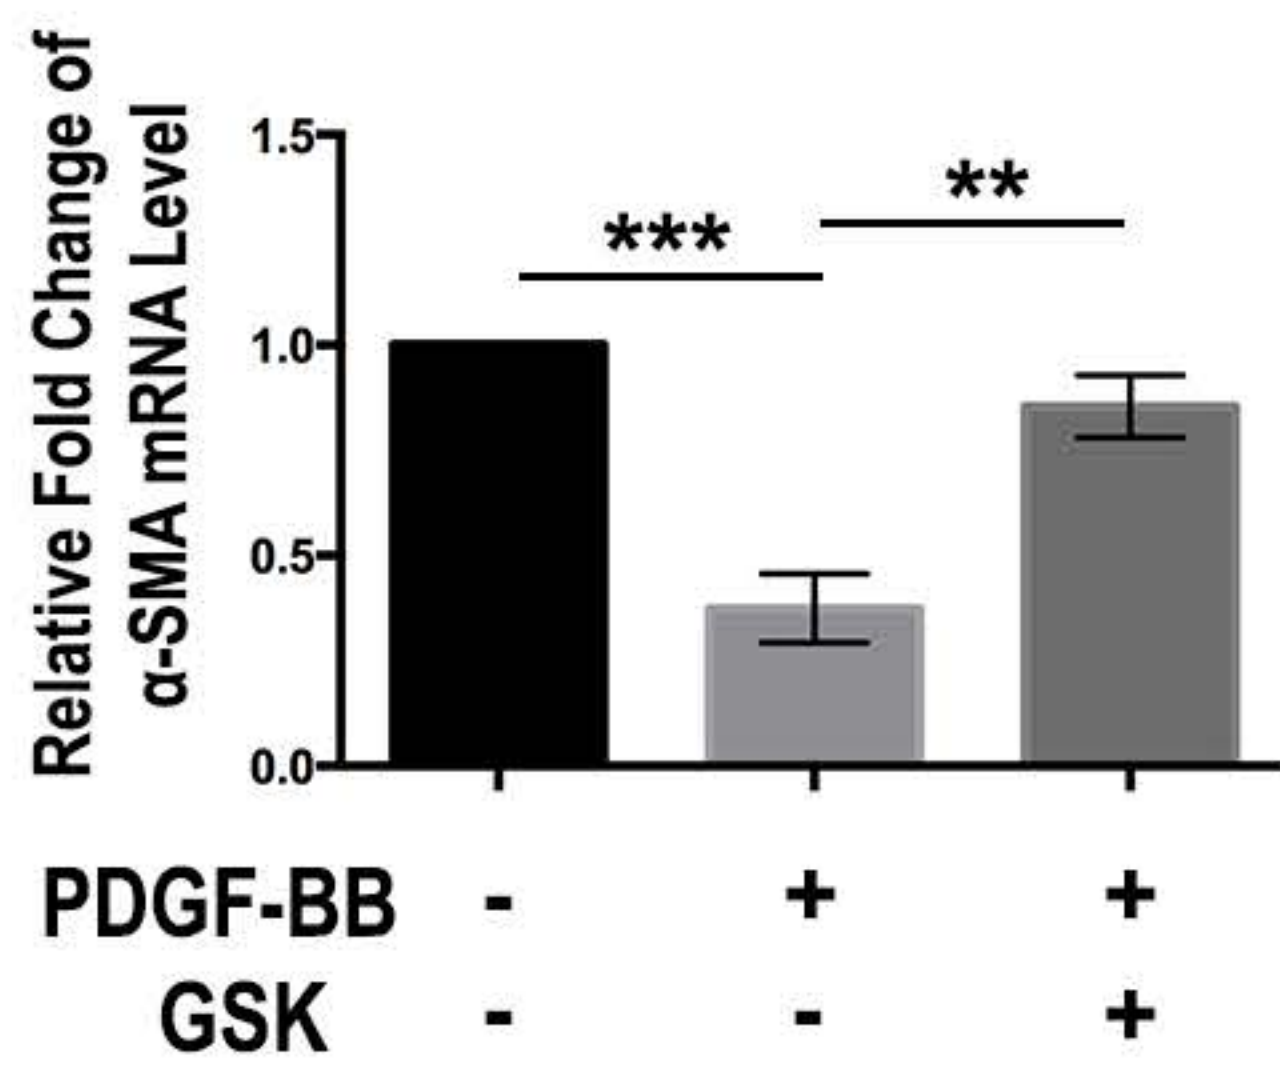**D**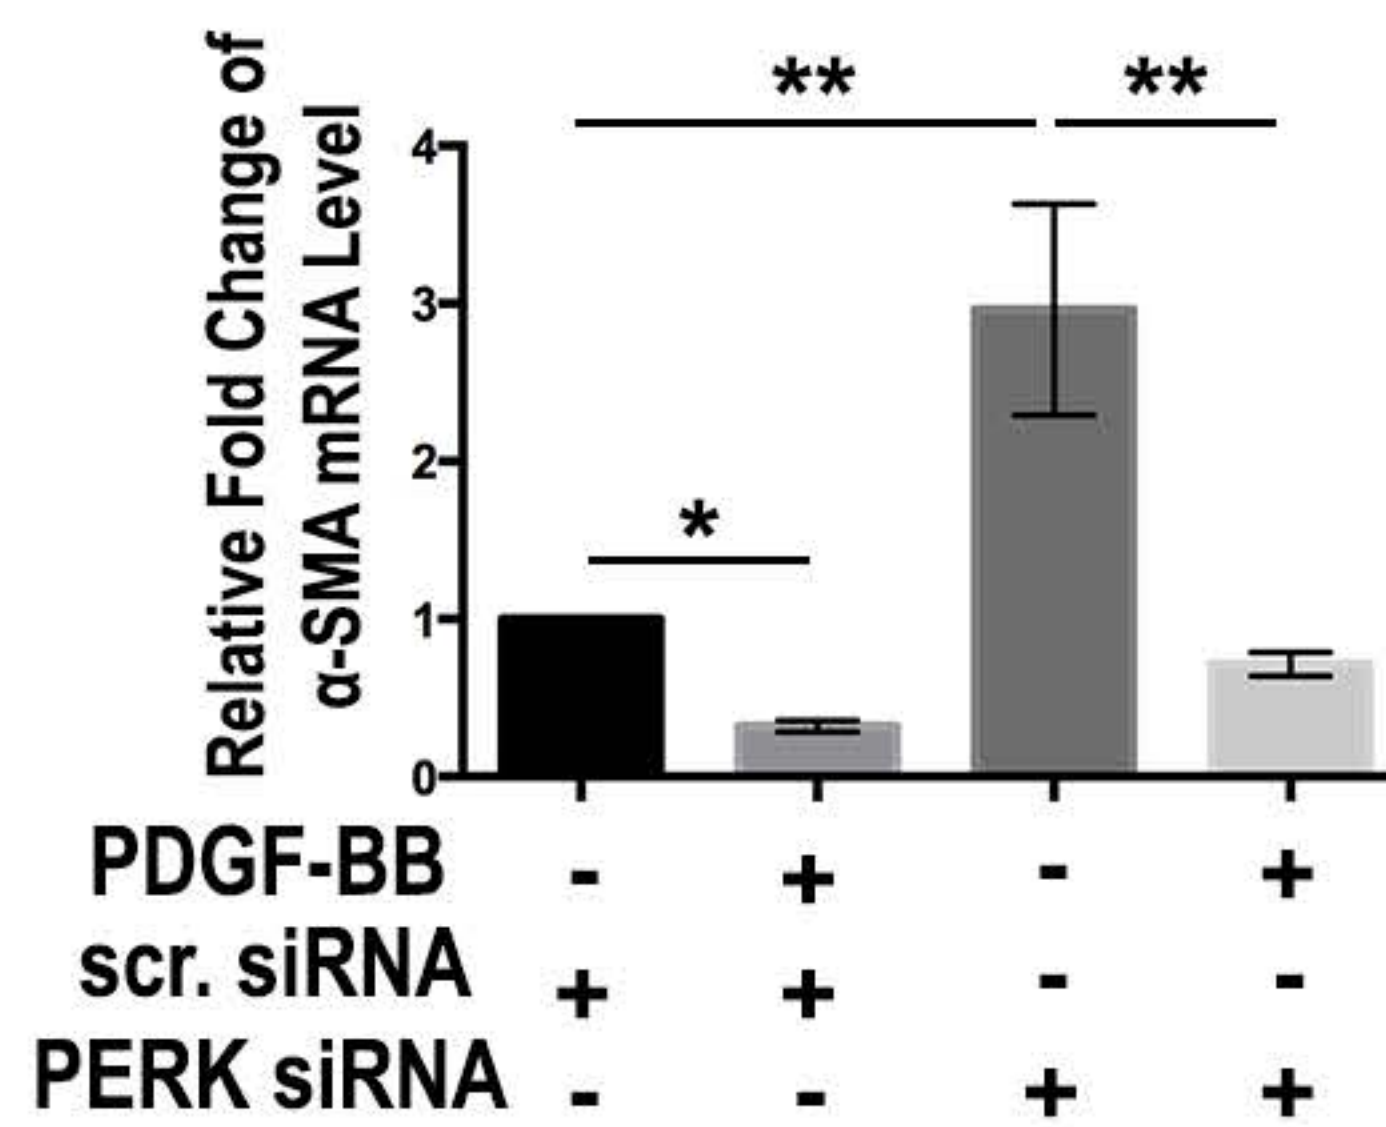**H**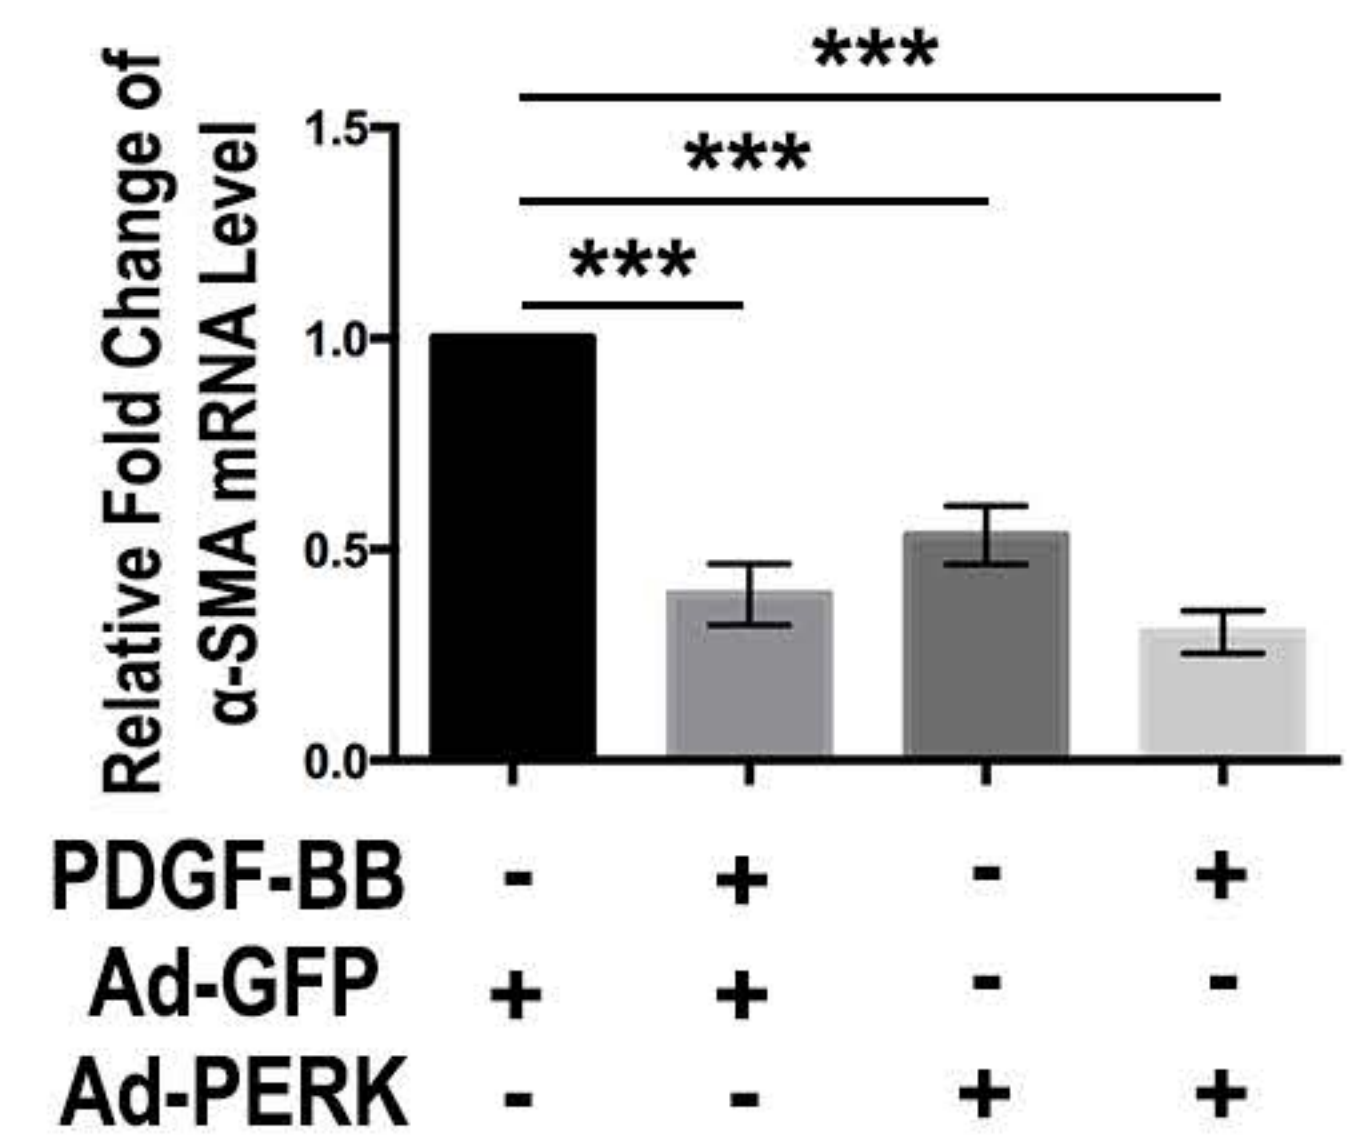**B**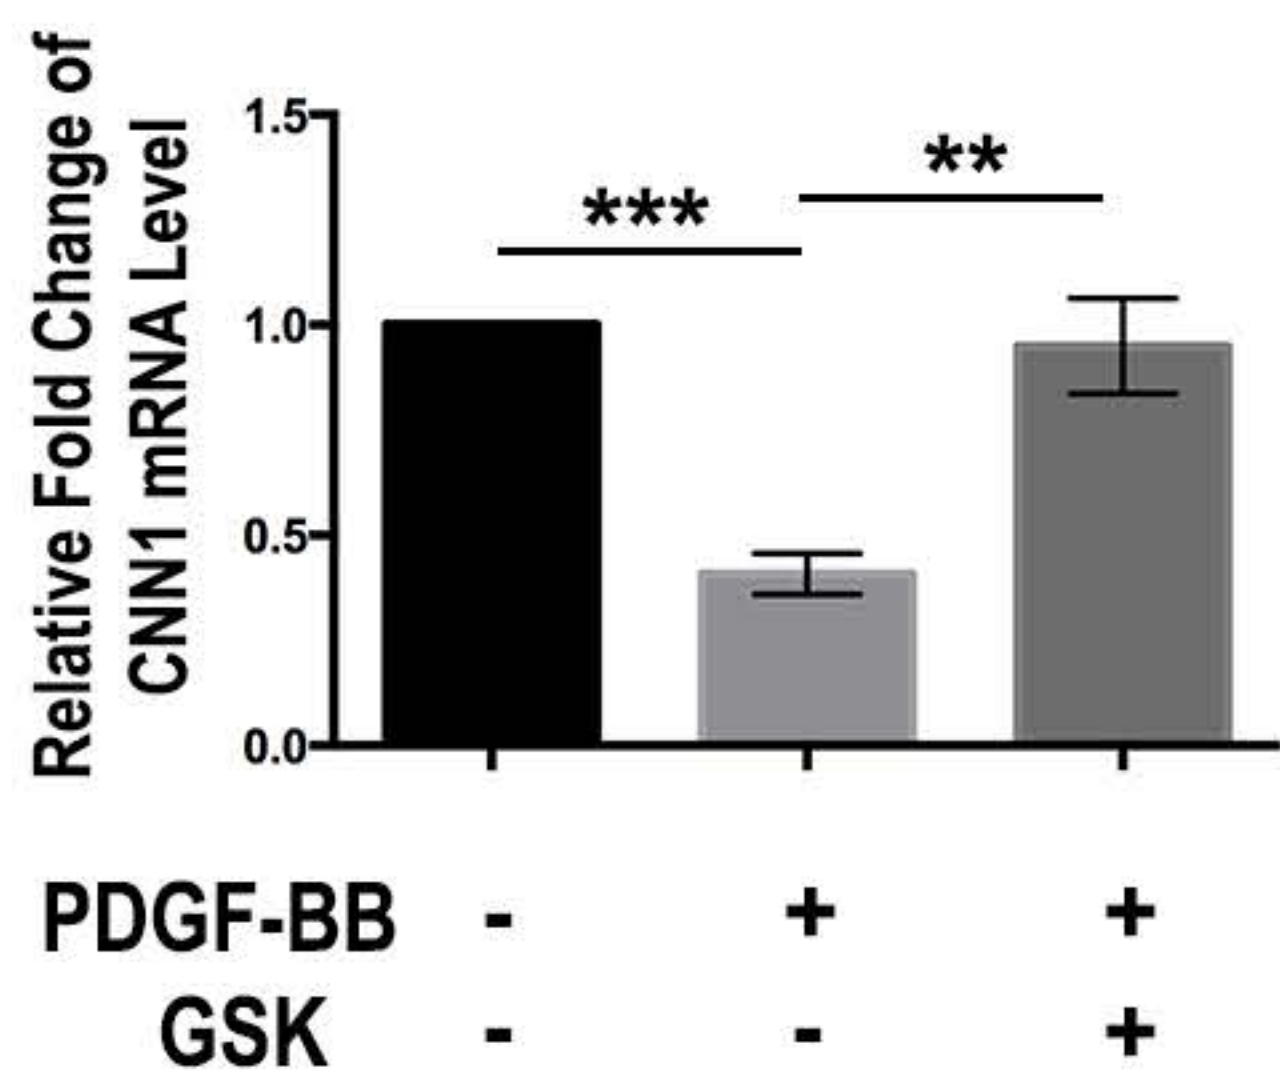**E**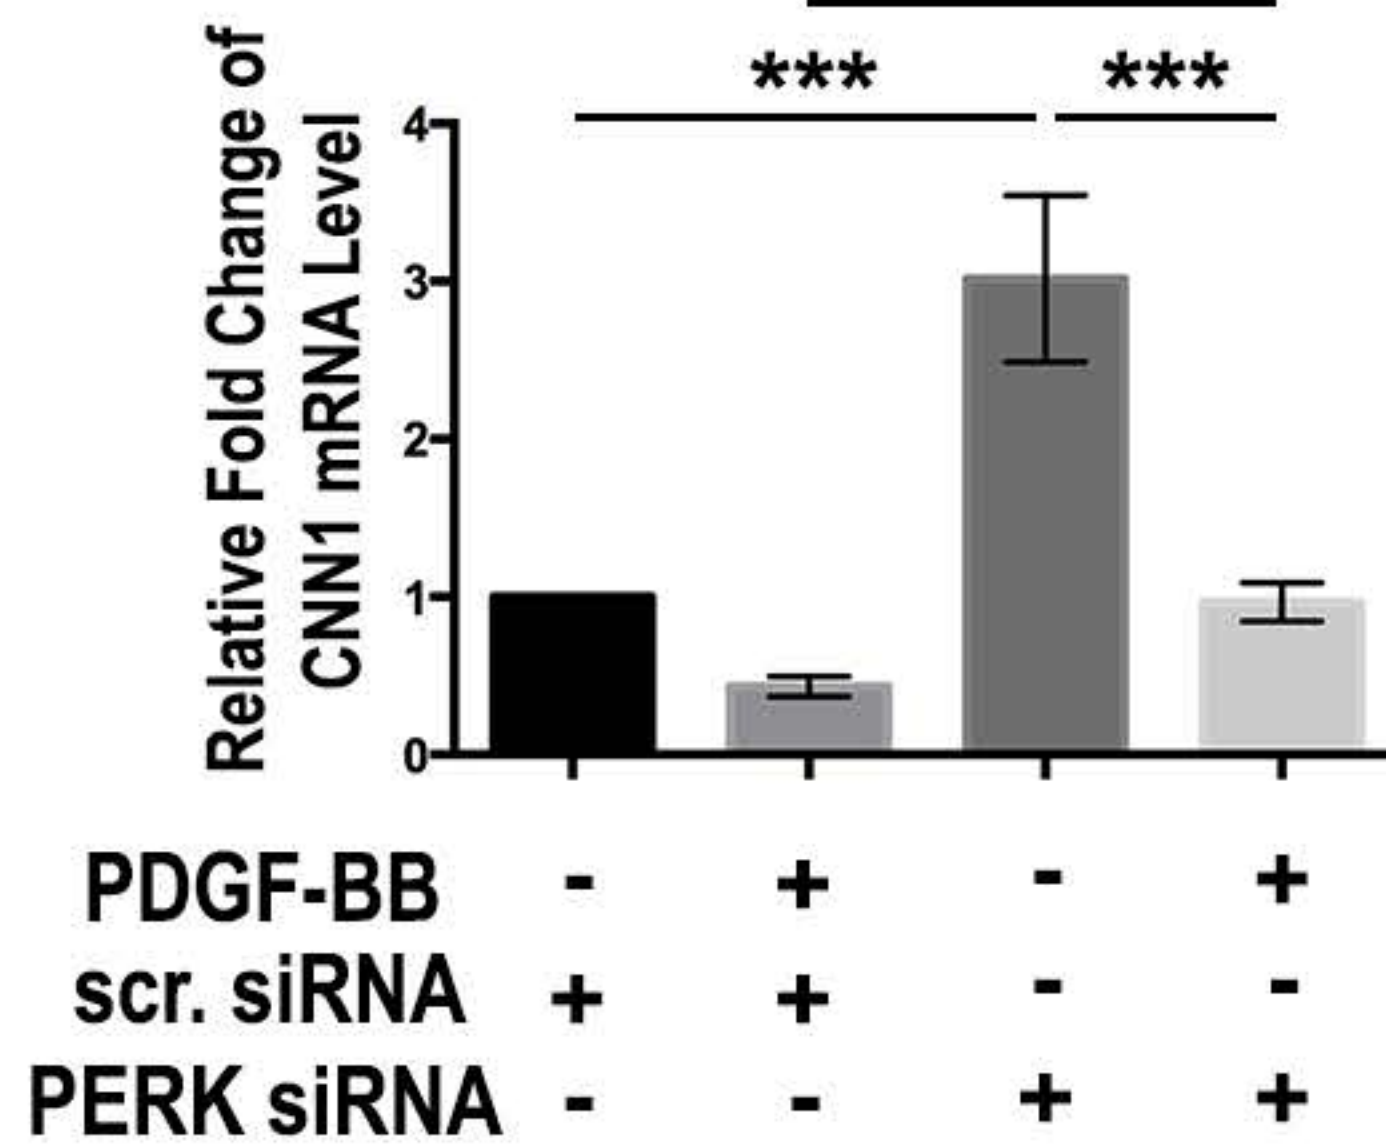**I**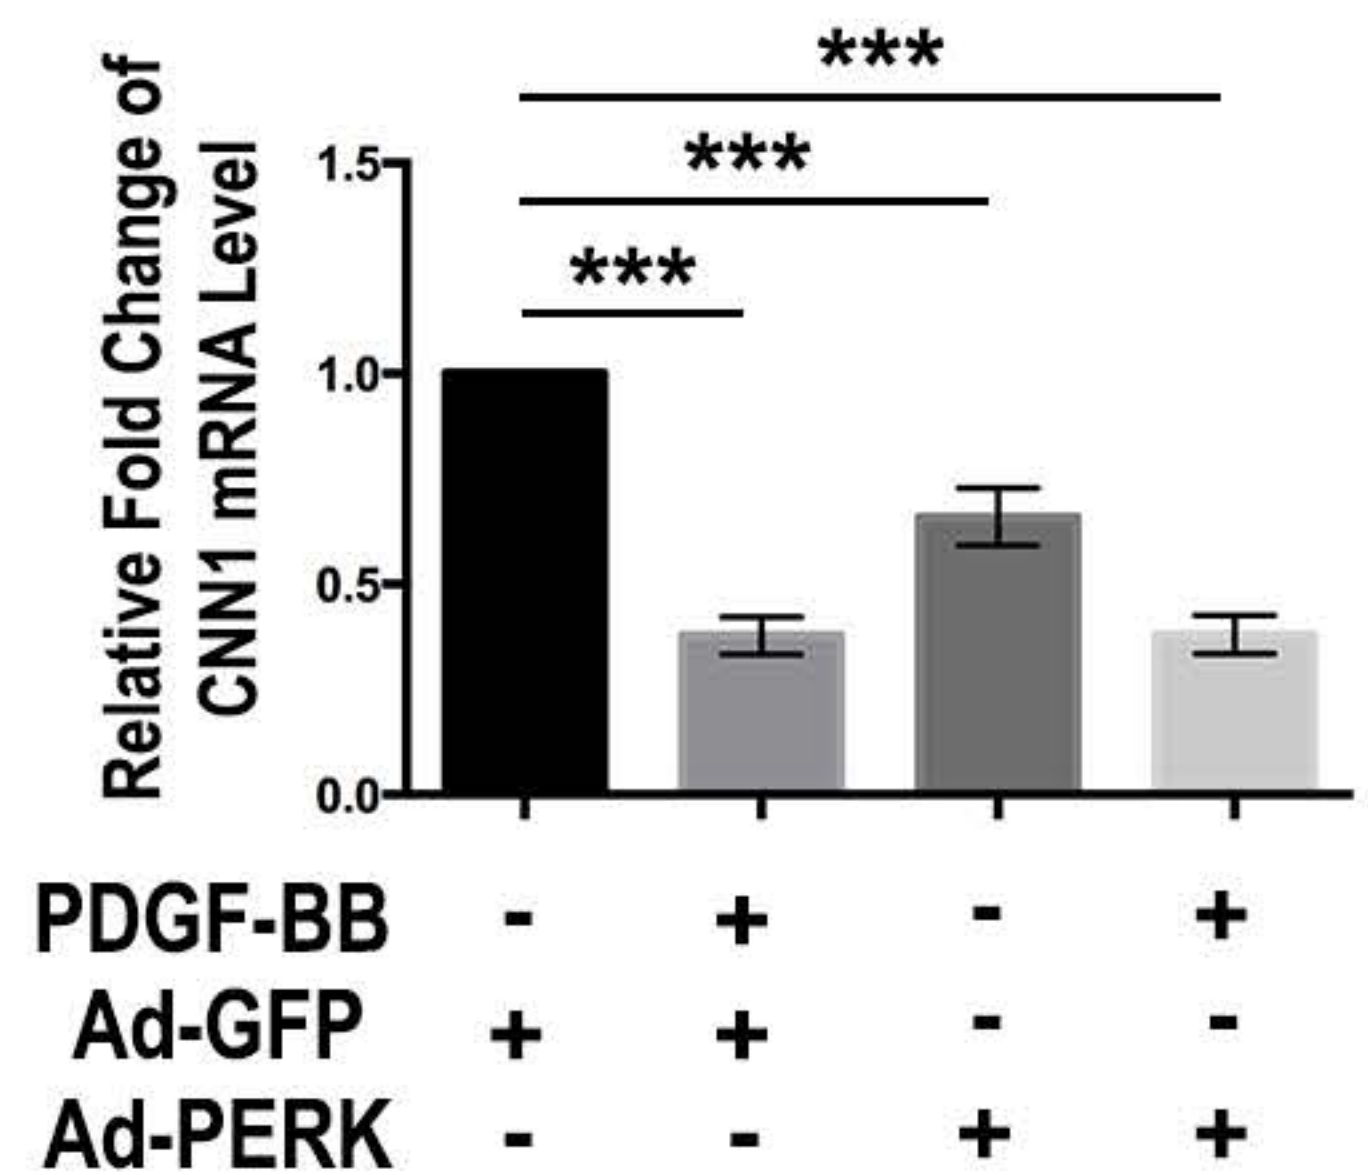**C**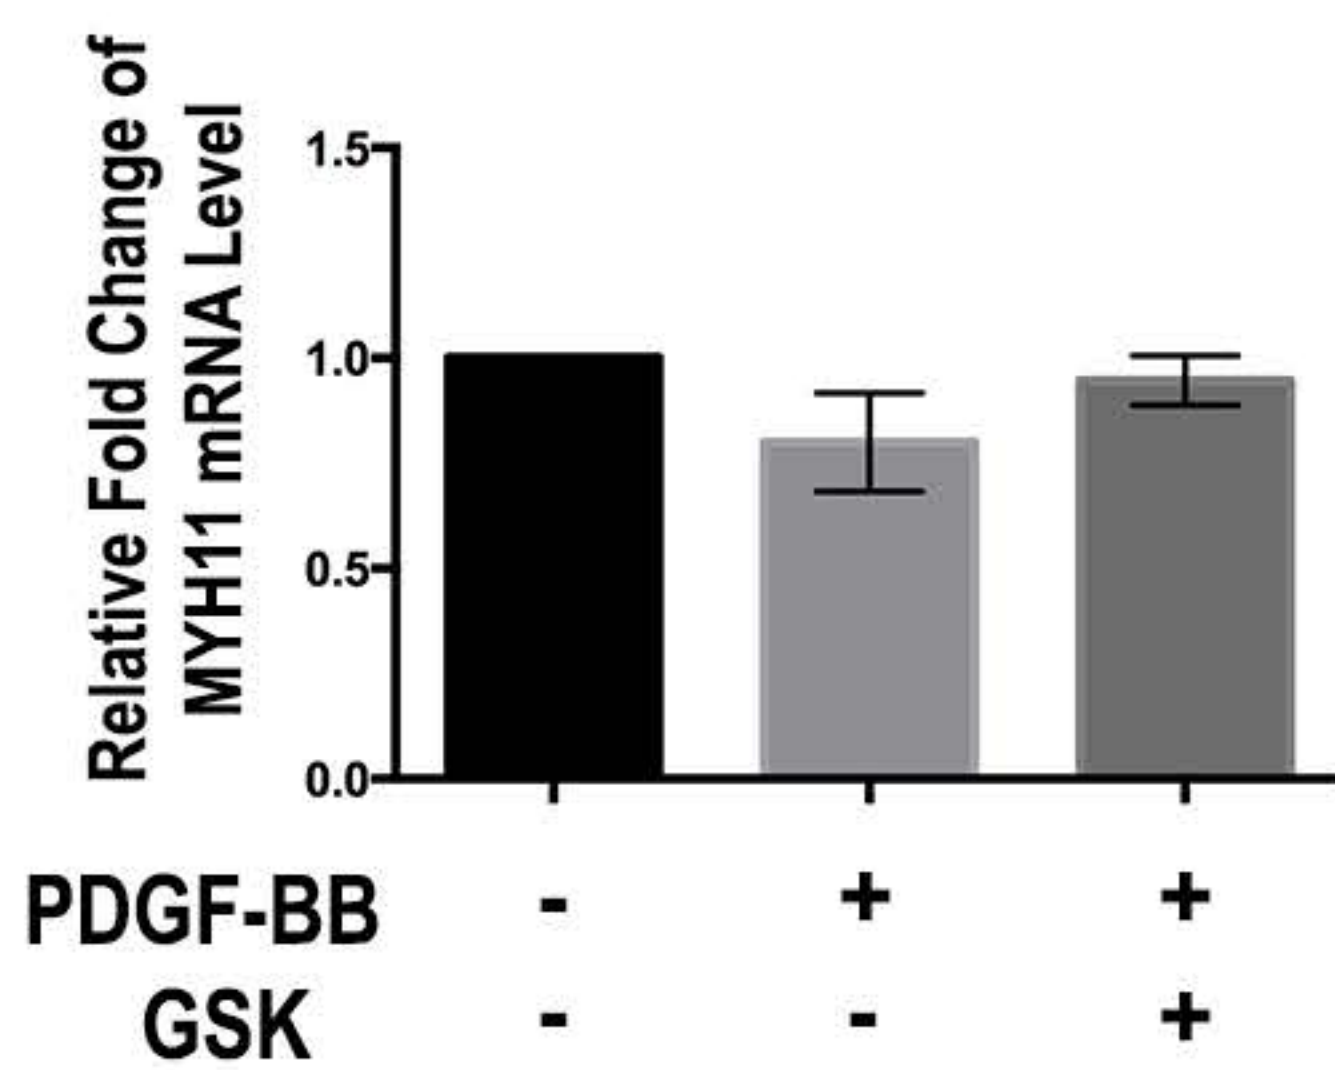**F**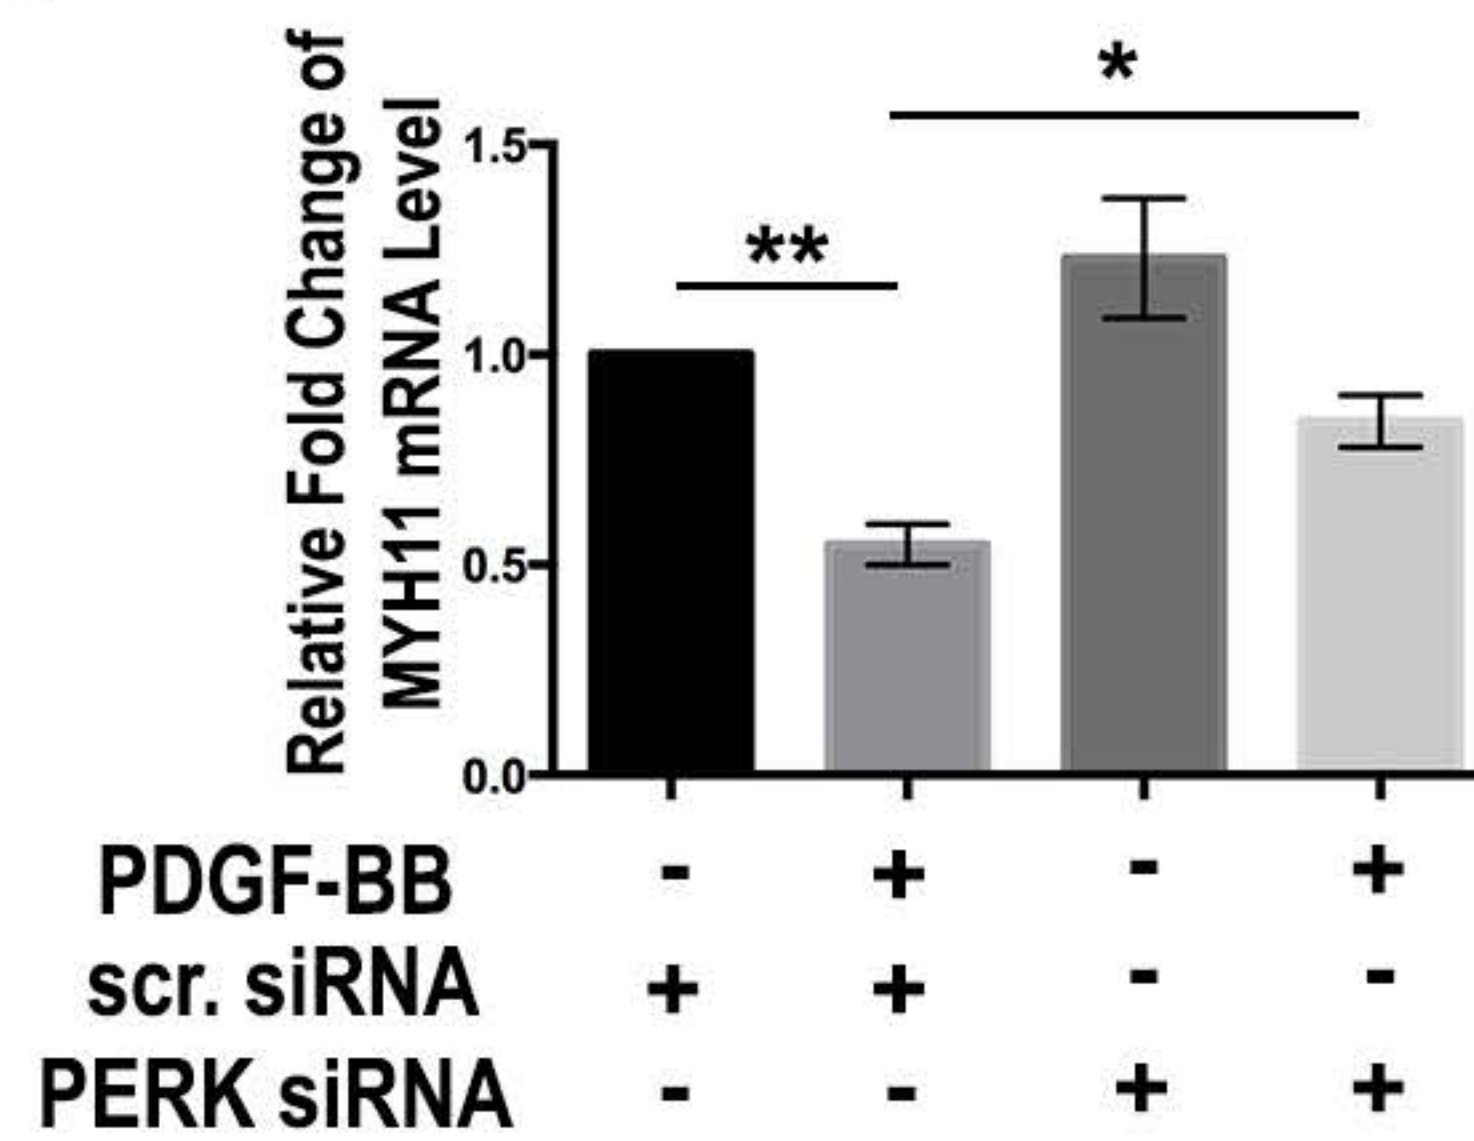**J**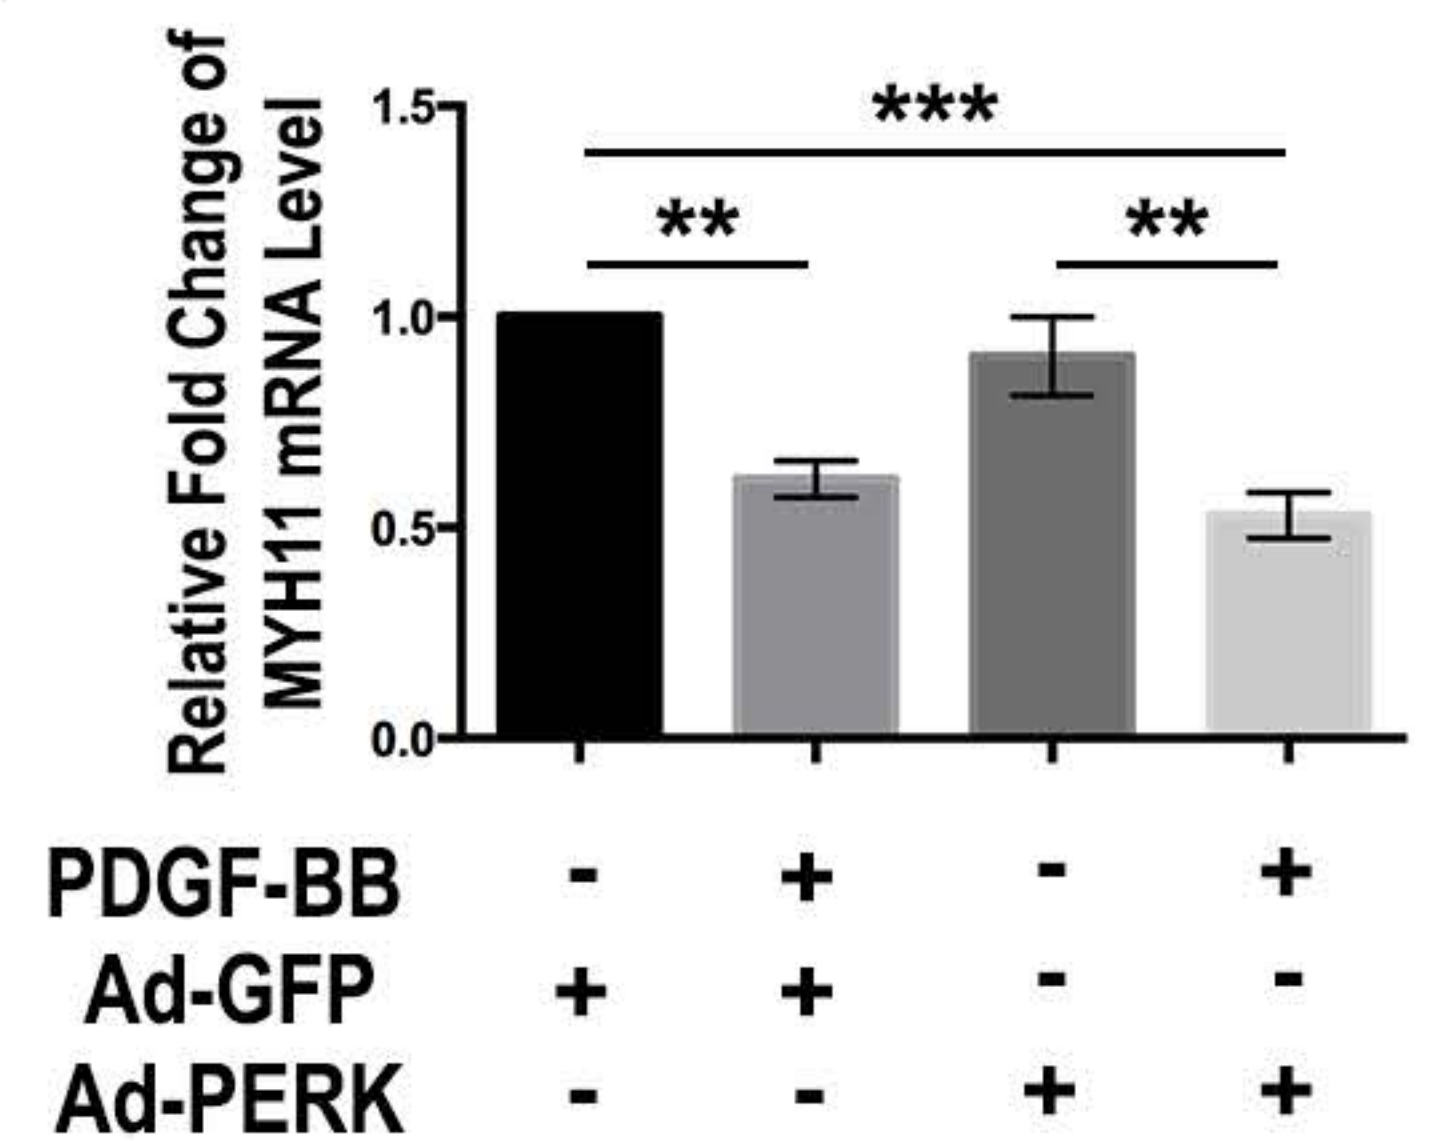**G**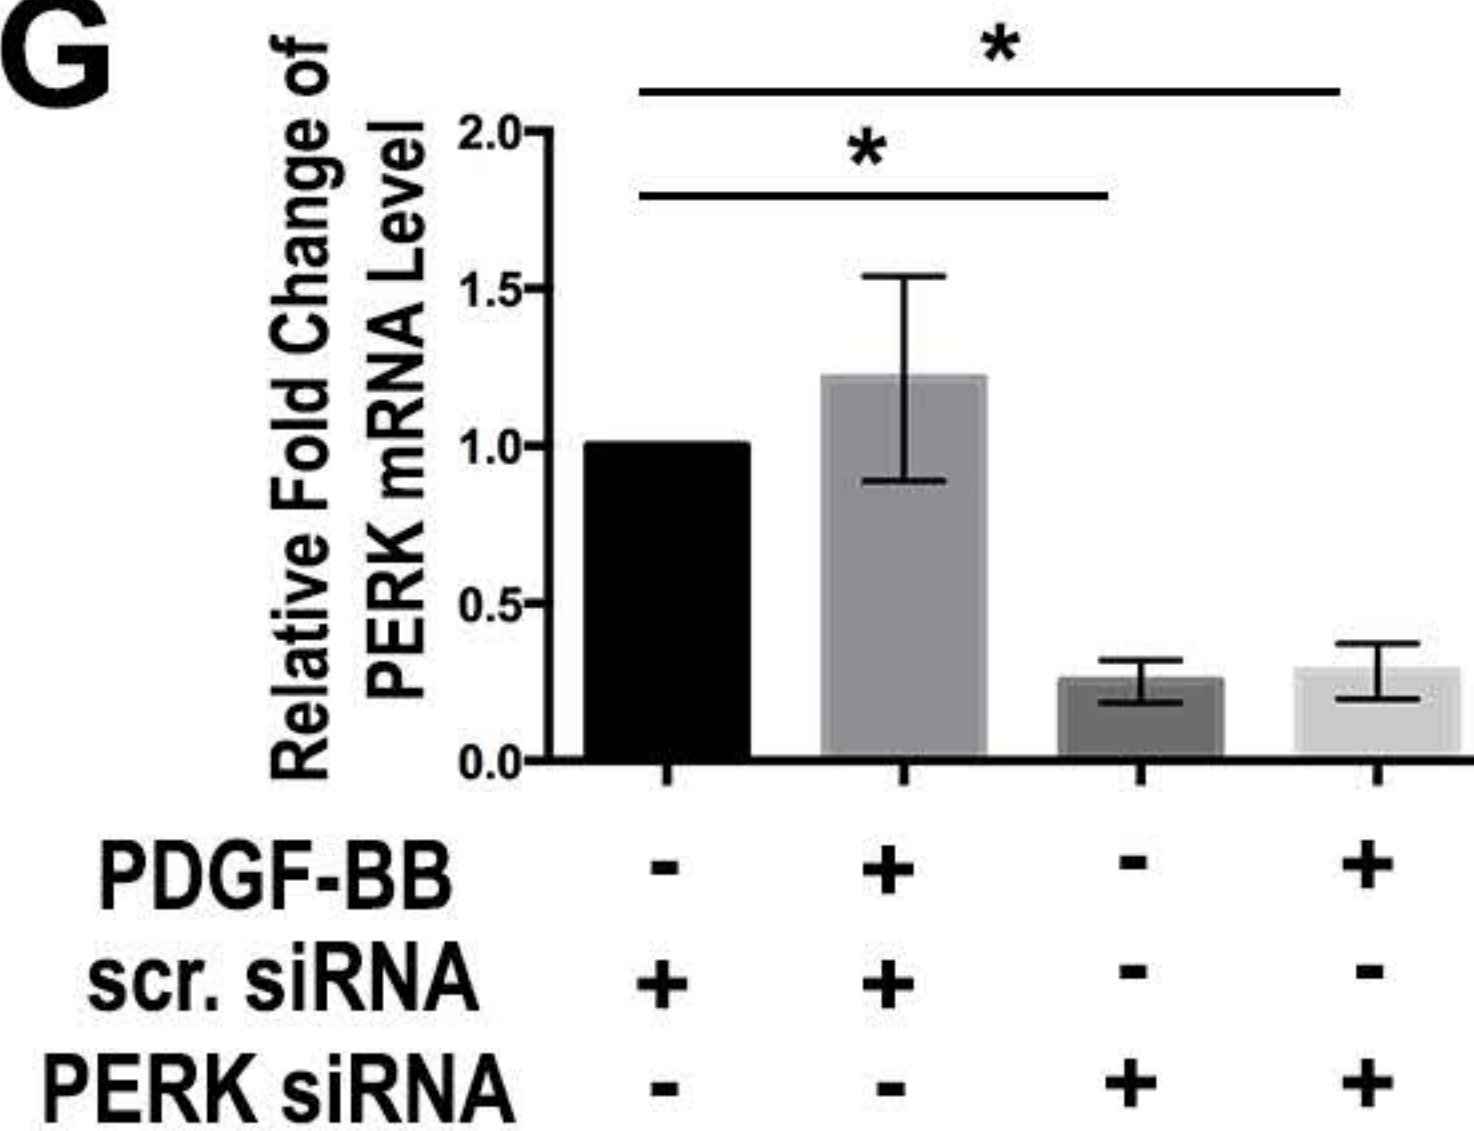

**A**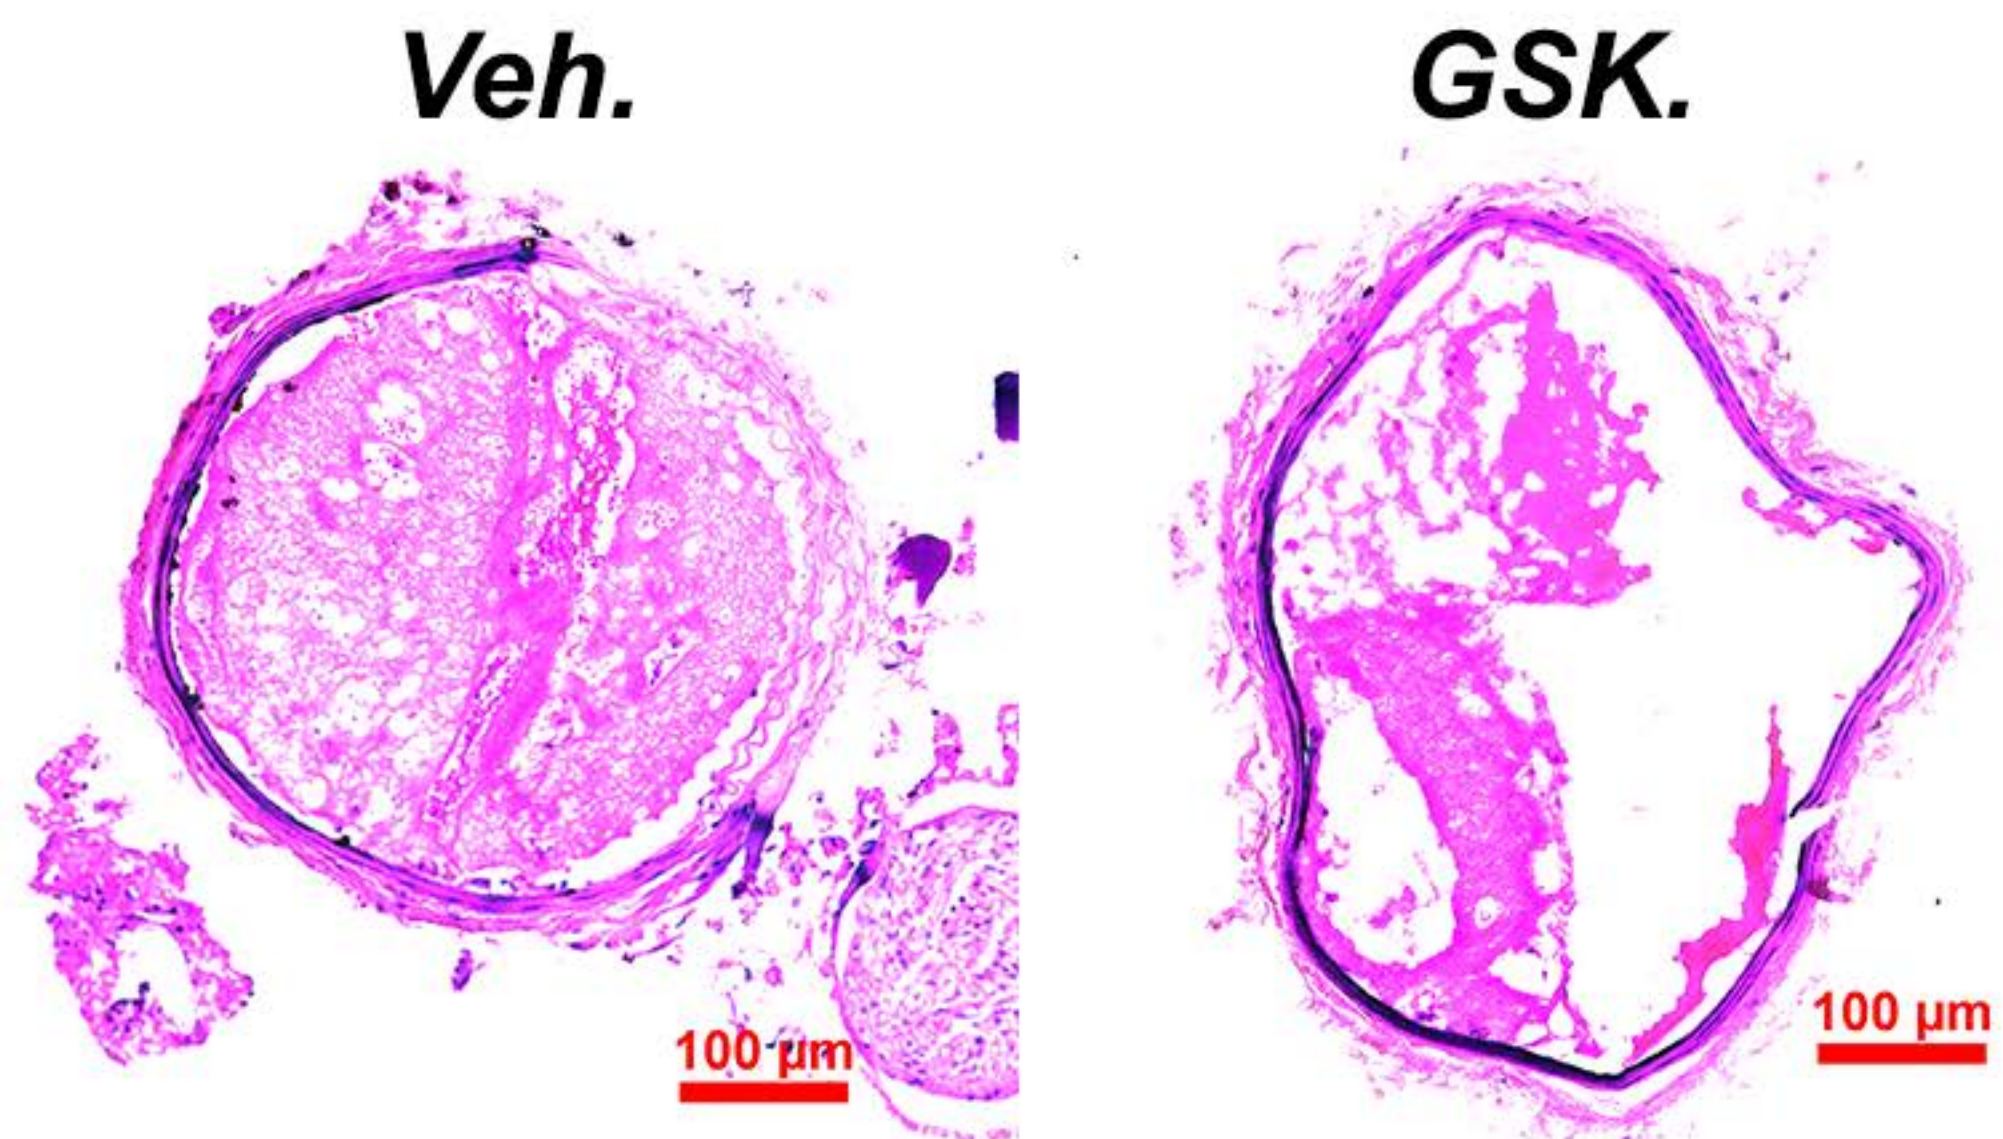**B**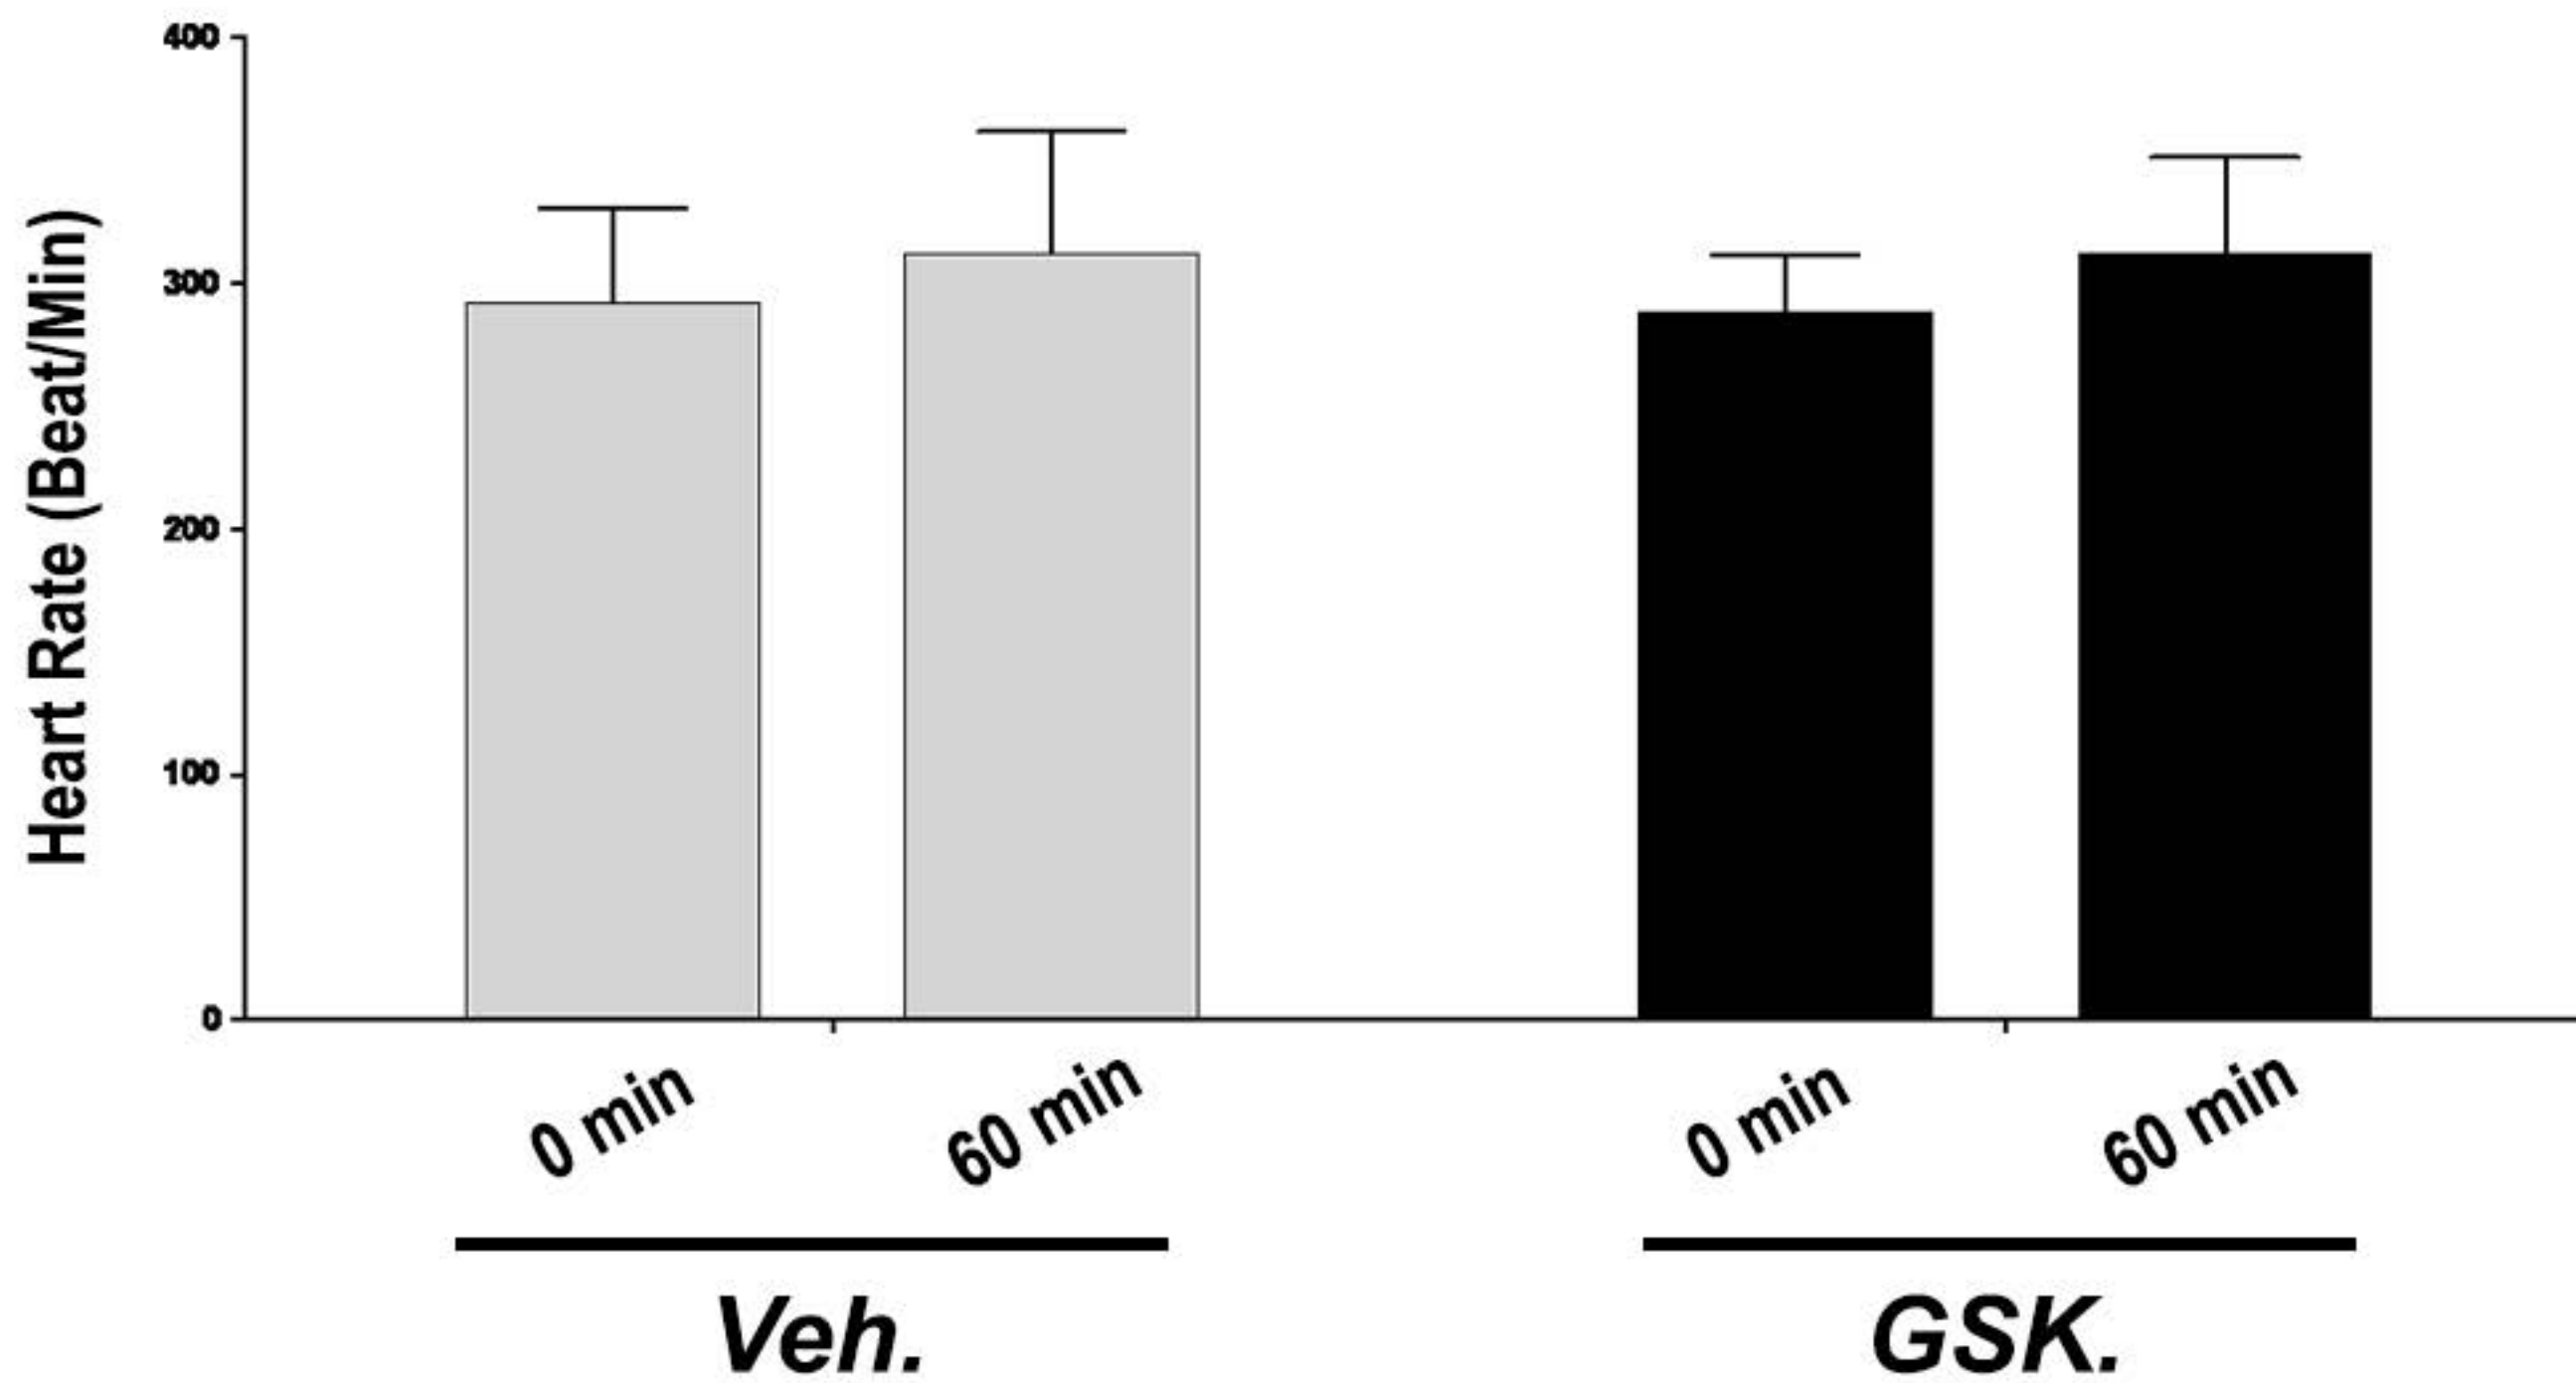



**A**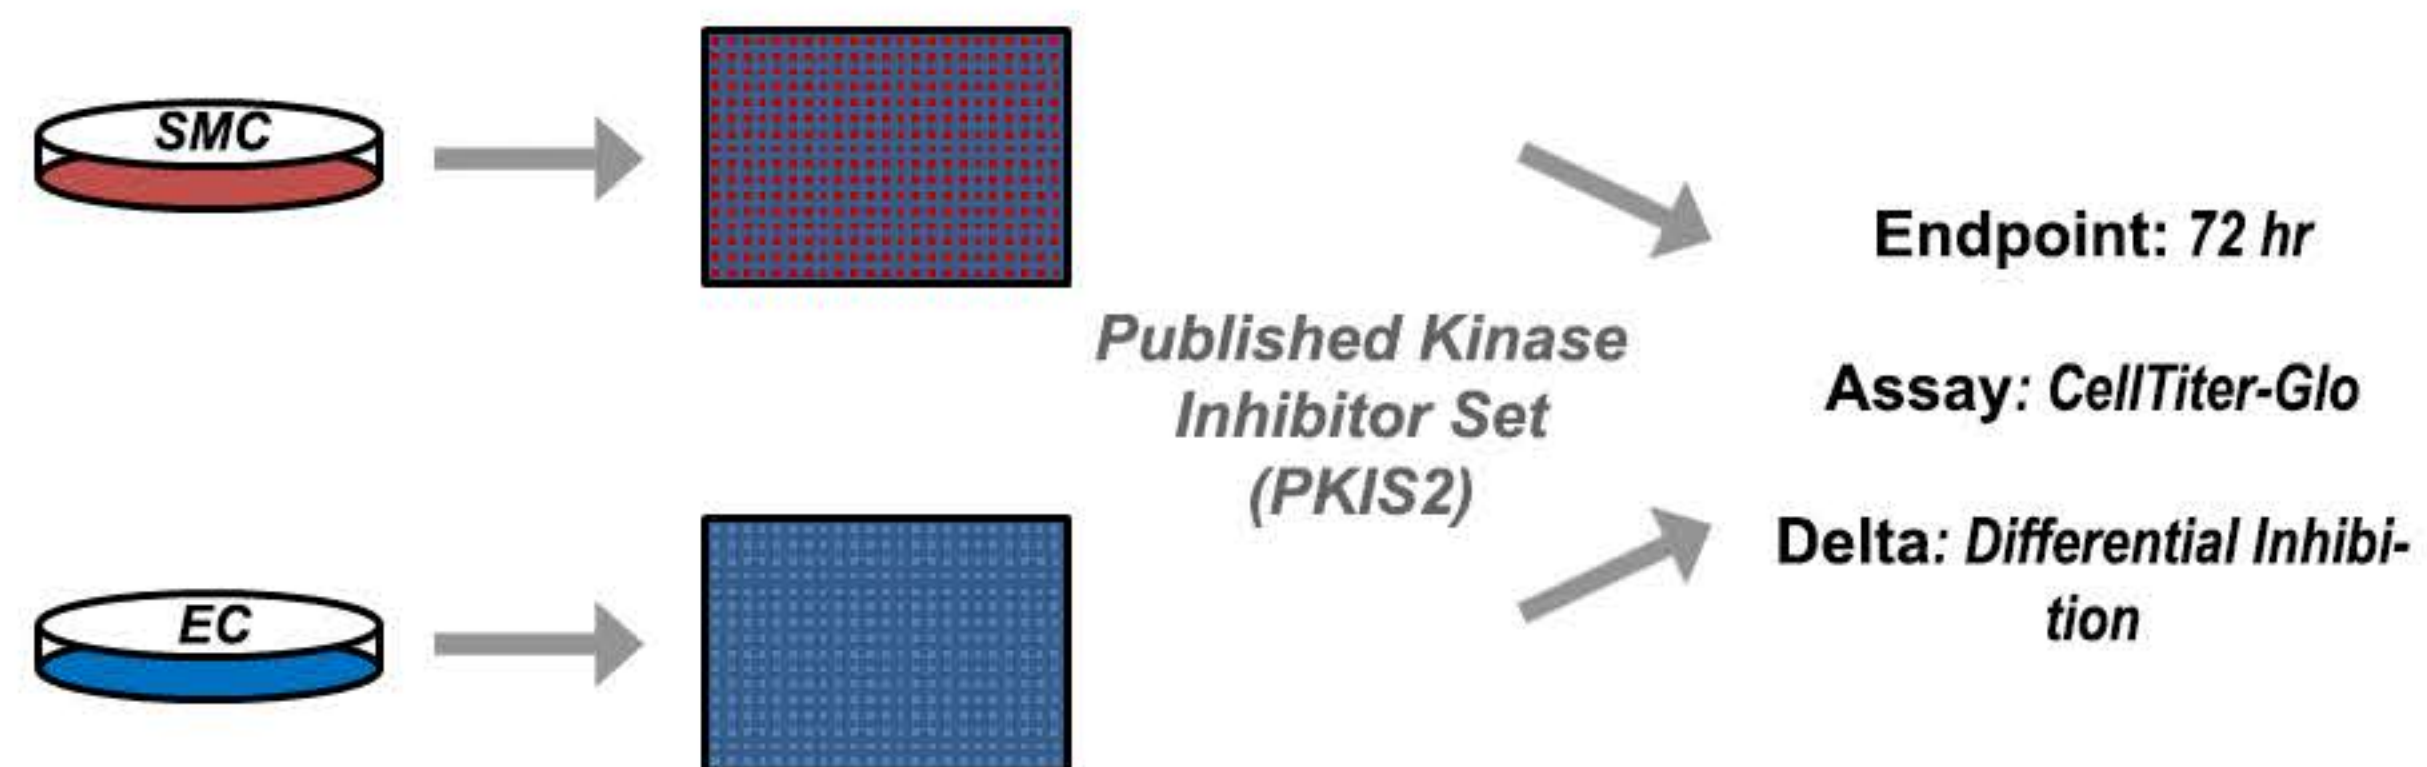**B**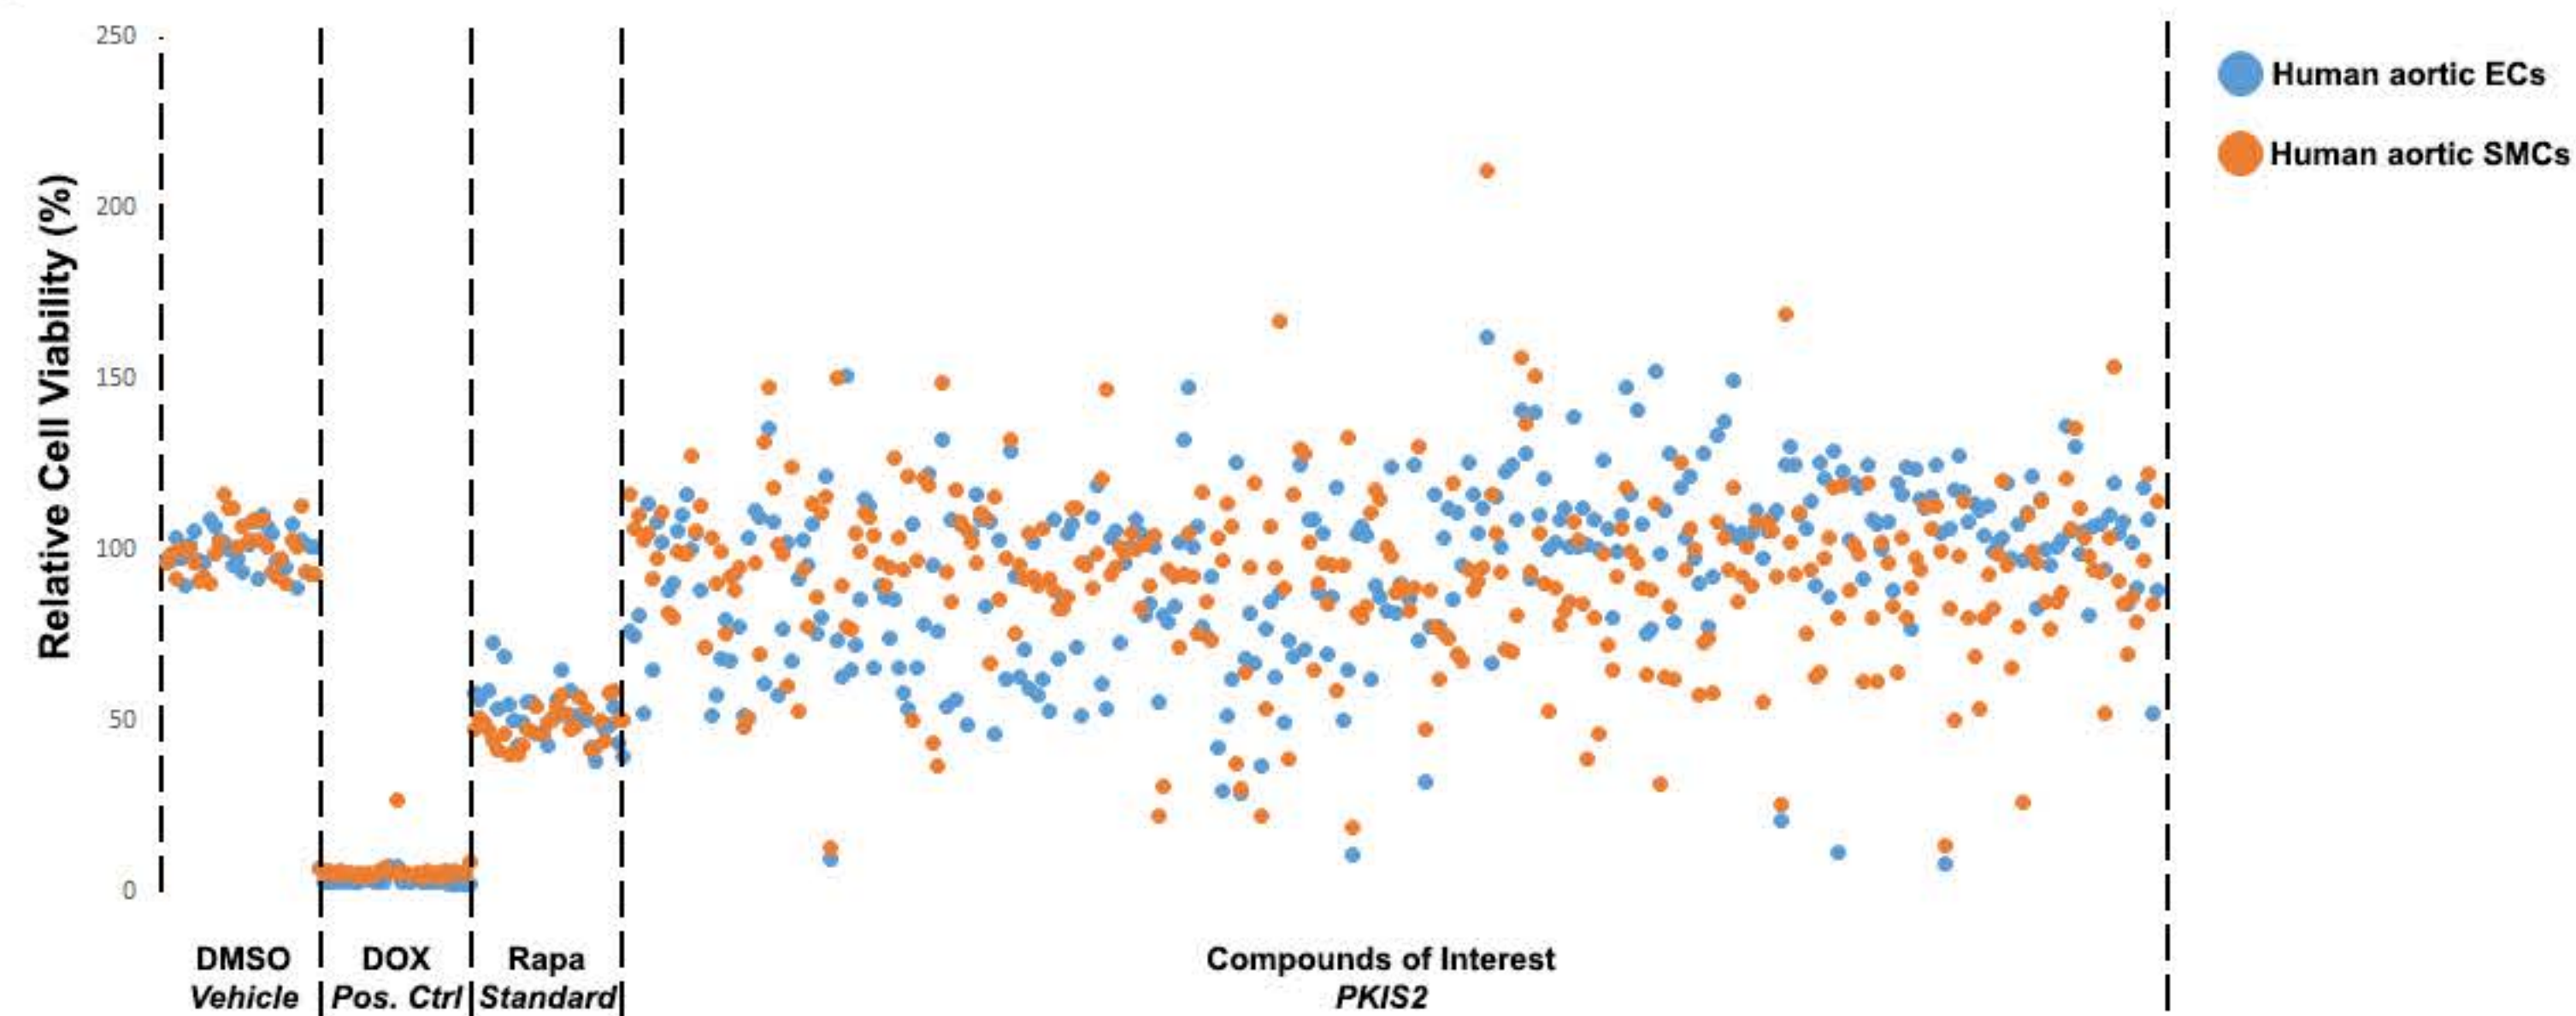**C**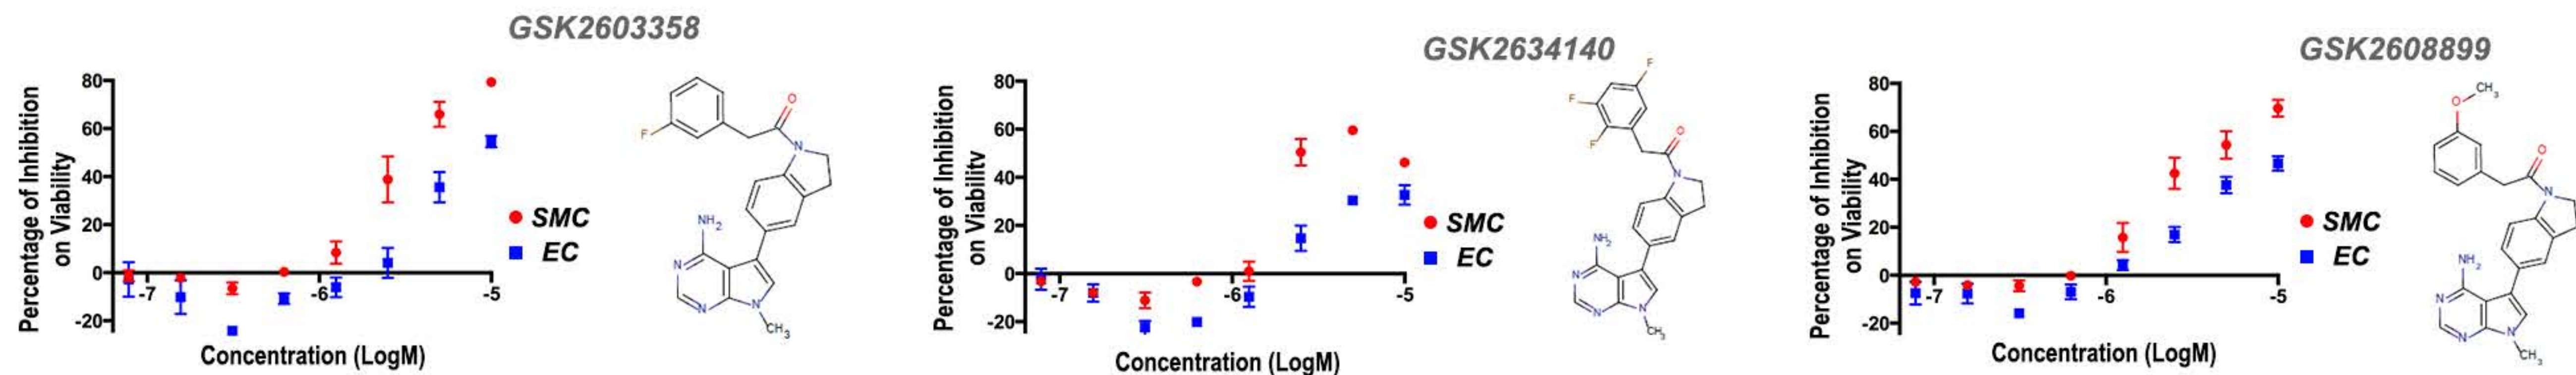

Supplement: mmc1.pdf [file mmc1.pdf]
